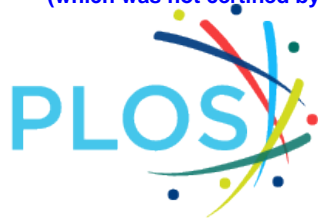

1

2

3

4

A coupled electro-mechanical approach for early diagnostic of

5

carpal tunnel syndrome

6

7

Saveliy Peshin<sup>1,2</sup>, Julia Karakulova<sup>3</sup>, Alex G. Kuchumov<sup>1,2\*</sup>

8

9

<sup>1</sup> Department of Computational Mathematics, Mechanics and Biomechanics, Perm National Research

10

Polytechnic University, Perm, Russia

11

<sup>2</sup> Biofluids laboratory, Perm National Research Polytechnic University, Perm, Russia

12

<sup>3</sup> Department of Neurology and Medical Genetics, Perm State Medical University, Perm, Russia

13

14

---

**\*Corresponding author:** [kuchymov@inbox.ru](mailto:kuchymov@inbox.ru) (AGK)

15

16

## 17 **Abstract**

18           Carpal tunnel syndrome (CTS) is a pathology affecting hand function caused by  
19 median nerve overload. Numbness in the fingers, a loss of sensory and motor function in  
20 the hand, and pain are all symptoms of carpal tunnel syndrome. The lack of numerical  
21 data about the median nerve mechanical strain inside the carpal tunnel is the main  
22 disadvantage of current clinical approaches employed in carpal syndrome diagnostics.  
23 Moreover, application of each diagnostic method alone often leads to misdiagnosis. We  
24 proposed a combined approach including hand motion capture, finite element modelling  
25 (FEM), and electromechanical simulations to evaluate median nerve compression and  
26 find a correlation with hand mobility. The hand motion capture provided the boundary  
27 conditions for FEM. After that, FEM simulations of finger flexion and hand flexion /  
28 extension were performed. Further, FEM results were put in the electrical model of nerve  
29 conduction based on the Hodgkin-Huxley model and extended cable equation. It was  
30 exhibited median nerve conduction reduced significantly throughout the flexion and  
31 extension of the hand that compared to finger flexion. During finger flexion and hand  
32 flexion and extension, the load distribution over each of nine finger flexor tendons was  
33 evaluated. The tendons of the index finger were found to have the highest Mises stress  
34 values. It was found how tendon and connective tissue contact types affected carpal tunnel  
35 pressure. The difference between the contact types was 31.7% for hand extension and  
36 59.9% for hand flexion. The developed approach has the potential to become an  
37 alternative diagnostic method for CTS at early stages. Additionally, it can be employed  
38 as non-invasive procedure for evaluation of carpal nerve stress.

39

40 Keywords: carpal tunnel syndrome, finite element modelling, motion capture, wrist,  
41 hand, Hodgkin-Huxley model, cable equation, median nerve.

## 42            **Introduction**

43            Carpal tunnel syndrome (CTS) is the most common tunnel neuropathy [1–3].  
44            The loss of sensory and motor functions in the hand impairs personal and social  
45            functioning [4]. CTS patients were found to be challenged by lack of hand mobility  
46            and failure to perform basic daily activities such as holding a pen, carrying out a  
47            job, or having a healthy night's sleep [5]. Initially, CTS only causes numbness and  
48            pain. The mild sensations can be rapidly eliminated by shaking out your hand.  
49            Rarely do people seek treatment in this situation. But as the suffering worsens day  
50            by day, sufferers feel compelled to get help. Additionally, every extra day of  
51            waiting increases the likelihood of serious nerve damage, which will make a person  
52            disabled. Meanwhile, hand pain is not always carpal tunnel syndrome [6,7].  
53            Relevant diagnostic methods at the moment are: questionnaires, movement tests,  
54            electrodiagnostic studies, magnetic resonance imaging (MRI), computer  
55            tomography (CT) and ultrasound investigation [8]. It should be noted that these  
56            diagnostic techniques' specificity and sensitivity are not always great, particularly  
57            at the early stages of CTS diagnosis. Additionally, utilizing just one method alone  
58            frequently results in incorrect diagnosis [9,10].

## 59            **Questionnaires**

60            Mononeuropathy clinical guidelines include questionnaires in many countries  
61            [11]. The most informative ones are: Boston Carpal Tunnel Questionnaire (BCTQ)  
62            [12], Disability of the Arm, Shoulder, and Hand Outcome Measure (DASH) [13],  
63            Michigan Hand Outcome Questionnaire (MHQ) [14], Upper Extremity Functional

64 Scale (UEFS) [15] and others [16–19]. The stage of the disease can be determined  
65 based on the results of the questionnaire.

66 It is evident that none of the outcome measures utilized in CTS patients can  
67 be regarded as the best or ideal outcome measure. Therefore, the clinician should  
68 choose the outcome measure in accordance with the main goal of their study and  
69 the target audience, the environment, and the time restrictions [20].

## 70 **Provocative tests**

71 Sensitive and specific provocative tests are important components of the  
72 physical and diagnostic examination of human's body. The most commonly used  
73 provocative tests for CTS are Tinel sign, Phalen's test, and Durkan's test [21]. On  
74 the one hand, these methods can be used equally with questionnaires to speed up  
75 the general understanding of a person's health status [22]. On the other hand, these  
76 methods are not completely relevant for making a diagnosis, especially in the early  
77 stages of carpal tunnel syndrome.

## 78 **Injection tests**

79 Another diagnostic test is the glucocorticosteroid injection into the carpal tunnel  
80 area. If the patient reacts positively afterwards (pain disappears), CTS is considered  
81 confirmed [23]. However, patients may decline treatment, if they experience  
82 anxiety after receiving a glucocorticosteroid injection [24].

## 83 **Electrodiagnostic testing, MRI and ultrasound studies**

84 Electrodiagnostic studies include nerve conduction studies and  
85 electromyography. Nerve conduction studies confirm CTS by detecting abnormal

86 median nerve conduction through the carpal tunnel when conduction is normal  
87 elsewhere [25]. The most clinically informative indicators are the M-response  
88 amplitude and median nerve conduction velocity. Electrodiagnostic studies have a  
89 sensitivity of 56% to 85% and a specificity of 94% to 99% for CTS [26]. Results  
90 may be normal in 30% of patients with mild CTS [27]. In addition, MRI is  
91 commonly used in CTS diagnosis as an objective method of determining the extent  
92 of morphological changes in the carpal tunnel [28]. However, MRI is difficult to  
93 assess the severity of the clinical course of the syndrome or the condition of the  
94 median nerve over time. Changes to the median nerve can be assessed not only by  
95 MRI, but also by ultrasound [29,30]. Ultrasound can detect the following  
96 characteristics: an increase in the cross-sectional area of the median nerve at the  
97 level of the carpal bones (distal carpal fold)  $> 9.8 \text{ mm}^2$  [31], flattening of the nerve  
98 at the entrance to the carpal tunnel [32], echogenic features variations [33] and  
99 estimate the transverse sliding patterns of the median nerve during finger  
100 movements [34]. Electrophysiological tests do not seem to be as cost-effective as  
101 using diagnostic ultrasonography to diagnose CTS [35].

## 102 **Finite element modelling**

103 Numerical values for carpal tunnel pressure can be determined using the finite  
104 element modelling (FEM). This method is widely used in various fields and has  
105 recently been applied in medicine [36]. The human carpal tunnel area includes  
106 tendons, ligaments, muscles, bones, nerves and others [37]. Thus, the application  
107 of the FEM was focused on studying the stress-strain state of all these tissues [38–  
108 49]. The transverse ligament is the upper arch of the carpal tunnel. It holds the  
109 tendons inside the canal and protects the median nerve from external loads. In this

110 context, the studies by Guo [39] and Yao [44] have aimed at determining the load  
111 on the transverse ligament. Ko and Brown [38] investigated the effect of fluid  
112 within the carpal tunnel on median nerve stress using FSI calculations. Their study  
113 shows that the effect of fluid is low compared to the mechanical contact of the  
114 tendons. The subsynovial connective tissue (SSCT) is inside the carpal tunnel and  
115 encompasses the tendons and median nerve. Biomechanical approaches using the  
116 FEM were developed by Henderson et. al. [42] and Chang et. al. [45] to determine  
117 SSCT mechanical behavior. The carpal bones are the lower arch of the carpal  
118 tunnel. On the other hand, the carpal bones have mobility during hand flexion and  
119 extension. Thus, the FEM has been widely applied to model the carpal bones  
120 [41,47–49]. Perevoshchikova et. al. [41] considered a 3D-printed scaffold for  
121 scapholunate ligament reconstruction. It is also good to look at the studies where  
122 researchers have created complex models of the carpal tunnel, tendons and fingers  
123 [40,43,46,50]. Mouzakis et. al. [46] developed a model based on a slice of an MRI  
124 scan. The model includes all tissues occurring in the carpal tunnel. Wei et. al. [40]  
125 also reconstructed a 3D model based on MRI images. In their study, the carpal  
126 bones and the bones of all the fingers of the hand were considered. In this way, a  
127 model of the entire hand was created. Lv et. al. [43] also developed a complex 3D  
128 finite element model based on MRI images. Their geometric model included 29  
129 bones, such as 14 phalanges, 5 metacarpals, 8 carpal bones and parts of the flexor  
130 pollicis longus, extensor pollicis longus, extensor pollicis brevis, extensor indicis  
131 and extensor indicis minimi; ligaments, such as the extensor retinaculum, flexor  
132 retinaculum, and annular ligaments that act as finger pulleys at the Interphalangeal  
133 (IP) joints and Metacarpophalangeal (MCP) joints ulna and radius; 9 muscles and

134 their tendons, such as the FDS, FDP, ED, flexor pollicis brevis. In order to  
135 successfully implement finite element calculations, these studies use Young's  
136 modulus and Poisson's coefficient for the tissue simulation. However, the  
137 mechanical properties of the soft tissues within the carpal tunnel have also been  
138 studied in several studies.

139 An important aspect of FEM is the mathematical model that describes the  
140 mechanical behavior of the tissue. At the same time, any model chosen requires a  
141 set of mechanical parameters for each tissue. For example, describing the behavior  
142 of tissue by a linear elastic equation requires two parameters: Young's modulus and  
143 Poisson's coefficient. This approach is convenient for calculations since it requires  
144 less computational resources. However, other approaches are used to obtain more  
145 accurate and valid results. Osamura et al. [51] defined the overall mechanical  
146 response with linear-elastic material properties; however the data curves appear to  
147 be non-linear with a strain-dependent response [52]. Main et al. [53,54] identified  
148 the tendon and median nerve properties as isotropic, non-linear, hyperelastic and  
149 described their mechanical behavior with Ogden model [55] and determined the  
150 parameters  $\alpha$  and  $\mu$ . Our previous work [50] also included modelling of the entire  
151 hand, including tendons, carpal tunnel, carpal bones and phalanges. At the same  
152 time, soft tissue materials have been defined by the Ogden model with parameters  
153 from Main et al. study. However, the carpal tunnel has been simplified and fixed,  
154 which corresponds to finger flexion, but does not accurately correspond to hand  
155 flexion. In this study, this lack will be taken into account in the FEM.

156

157



## 158 **Nerve conduction modelling**

159           The median nerve contains sensory, motor and autonomic fibers. Sensory nerve  
160 fibers are known to lose their conductivity faster than motor fibers if the nerve is  
161 under external mechanical stress [56–59]. The classical mathematical model  
162 describing the conduction of an electrical signal along the axon of a neuron was  
163 developed by Hodgkin and Huxley [60]. The model is based on differential  
164 equations system that describe the membrane exchange of *Na* and *K* ions. Further,  
165 FitzHugh [61] introduced a simplified Hodgkin-Huxley model (H-H), which  
166 consists of two equations versus Hodgkin-Huxley's order of twenty. Later, these  
167 models have been improved and refined by other researchers, but the basic approach  
168 remains the same. However, these models describe the action potential at a single  
169 point. In order to simulate median nerve conduction, it is necessary to describe its  
170 conduction along a defined distance. The traditional cable equation is used [62] for  
171 the action potential propagation along the neuron. The extended cable equation is  
172 used to take into account the shape effect of the peripheral nerve. Changing the  
173 cross-sectional area of the nerve reduces conduction. Coupling the conduction  
174 model and the cable equation is used to describe nerve fiber conduction [63–68].

## 175 **Aim of study**

176           The aim of this study is to develop a combined electro-mechanical approach  
177 for early diagnosis of carpal tunnel syndrome based on modern biomechanical and  
178 mathematical modelling methods as well as applying the developed approach and  
179 obtaining new numerical results in the stages of the approach.

180

## 181 **Materials and Methods**

182 This paper presents a combined electro-mechanical approach for early CTS  
183 diagnosis, including hand motion capture, FEM of the patient-specific hand based  
184 on MRI, CT, and mathematical modelling of nerve conduction (Fig 1). An  
185 important criterion of this approach is the confirmation of the disease at an early  
186 stage. This is necessary to reduce rehabilitative time and avoid traumatic surgery.

187  
188  
189

190 **Fig 1.** A six-stage approach for the early diagnosis of carpal tunnel syndrome.

191  
192

## 193 **Data collection**

194 The first stage is performing an MRI and CT scan of the volunteer's hand.

195 The research protocol used in this study was approved by the Ethical  
196 Committee Board of Perm State Medical University (Protocol No. 17 on 25  
197 November 2022). The volunteer had no hand disease or associated neurological  
198 disorders. Participant signed written informed consent. The participant was  
199 recruited for research purposes in the period between 5 December 2022 and 23  
200 December 2022. Authors had no access to information that could identify individual  
201 participant during or after data collection.

202 DICOM files are using to create patient-specific 3D geometry of the carpal  
203 tunnel, tendons, ligaments, median nerve, and phalanges. CT scans are the best way  
204 to visualize a human's bones. In such a case, the carpal and metacarpal bones, as  
205 well as the distal, intermediate, and proximal phalanges, were built up from CT

206 scans. At the same time, soft tissues such as the median nerve, tendons, ligaments  
207 and connective tissue may be visible on MRI scans.

208

### 209 **3d Model extraction**

210 However, the resulting 3D models require post-processing. The post-  
211 processing of the tissues was performed using the Meshmixer software. The three-  
212 dimensional tendon geometry was built based on a set of cross-sectional planes of  
213 the obtained DICOM file geometry. The resulting personal geometry of the left  
214 hand and carpal tunnel after processing is shown in (Fig 2).

215

216

217 **Fig 2.** Patient-specific finite element model of carpal tunnel (a) – general view, (b) – top  
218 view, (c) – bot view and. (d) – Finite element model of a hand (carpal tunnel is hidden), (e)  
219 – The connection of the phalanges with the joint and the coordinate system of the joint.

220

221

### 222 **Hand motion capture**

223 The human hand is a unique manipulator that can handle many mechanical  
224 tasks. Different people may perform certain mechanical tasks differently in their  
225 daily lives. For example: how to hold a fork or a mug, how to type on a computer  
226 keyboard, or how to hold a phone. Depending on age, anatomy, and gender, people  
227 can flex their fingers and move their hands differently. To take individual hand and  
228 finger movements into account, software was developed to capture hand movement  
229 in real time and determine the coordinates of characteristic hand points (Fig 3) [69].  
230 Visual Studio Code and Python were used for software development. Learned free  
231 artificial intelligence is used in the software to determine points on the hand using

232 video from a camera. The software applies the points to the hand, determines the  
233 coordinates of the points, and moves the position of the points during hand  
234 movement in real time. A line simulating the phalanx is drawn on the two  
235 coordinates. The angle between the two lines describing the angle between the two  
236 phalanges of one finger is then determined. Angle changes in the distal  
237 interphalangeal joint, proximal interphalangeal joint and metacarpal phalangeal  
238 joint of all fingers were obtained using the developed software according to the  
239 formulas:

240

$$\begin{aligned} X_i &= x_{i+1} - x_i \\ Y_i &= y_{i+1} - y_i \quad i \in \overline{1, 21}, \\ \bar{n}_i &= \{X_i; Y_i\} \end{aligned} \quad (1)$$

$$\cos(\varphi_i) = \cos(\bar{n}_i; \bar{n}_{i+1}) = \frac{\bar{n}_i \cdot \bar{n}_{i+1}}{|\bar{n}_i| \cdot |\bar{n}_{i+1}|} = \frac{X_i \cdot X_{i+1} + Y_i \cdot Y_{i+1}}{\sqrt{X_i^2 + Y_i^2} \cdot \sqrt{X_{i+1}^2 + Y_{i+1}^2}}, \quad (2)$$

243

244 where  $x, y$  – characteristic point coordinates,  $X, Y$  – components of the normal  
245 vector  $n, i$  – characteristic point number,  $\varphi$  - angle between the phalanges.

246

247

248 **Fig 3.** Motion capture process

249

250

## 251 **Finite element model**

252

253

254

The fourth stage is FEM based on a patient-specific geometrical model. The FEM was used to simulate various hand and finger movements. The three-dimensional geometry was imported into the finite element software ANSYS to

255 generate the finite element model with interaction material parameters, boundary  
256 conditions and loading conditions defined. Two types of geometry were built based  
257 on MRI and CT to calculate carpal tunnel stress during finger flexion and hand  
258 flexion and extension. The first geometric model included SSCT, median nerve,  
259 nine finger flexor tendons, transverse ligament, all phalanges, metacarpal bones,  
260 and simplified carpal bones. The finger flexion geometry consisted of 40 solid  
261 bodies that were in contact and joined together. The whole first geometry is divided  
262 into 422,779 nodes and 122,486 elements by hexahedral and tetrahedral elements.  
263 The second geometric model included SSCT, median nerve and nine tendons. The  
264 hand flexion and extension geometry consisted of 11 solid bodies. The whole  
265 second geometry is divided into 126,307 nodes and 56,723 elements by hexahedral  
266 and tetrahedral elements. Hexahedral elements are used to build the tendon mesh  
267 and median nerve in both geometries.

## 268 **Joints and contact**

269 One type of joint (Revolute) and two types of contact (Bonded and No  
270 Separation) were used in FEM. Revolute joint limit the free movement of bodies to  
271 one degree of freedom. The only motion that is possible between two jointed bodies  
272 is rotation around the Z-axis (Fig 2e). Revolute joints are used to simulate finger  
273 flexion in the joint between the distal phalanx and the middle phalanx (distal  
274 interphalangeal joint), the joint between the middle phalanx and the proximal  
275 phalanx (proximal interphalangeal joint) and the joint between the proximal  
276 phalanx and the metacarpal bones (metacarpal phalangeal joint). Bonded contact  
277 type is used to model bodies which strain, stress and displacement in the contact  
278 zone are the same. In other words, the bodies are rigidly connected to each other

279 and cannot move relative to each other in the contact zone. No separation contact  
280 allows the bodies in the contact zone to move along in the tangential direction  
281 without friction, and prohibits movement in the normal direction. Thus, the bodies  
282 cannot move away from each other but can slide. The types of solid contact are  
283 shown in (Table 1).

284 The median nerve was connected to the connective tissue by no separation  
285 contact type for finger flexion model. The contact between the tendon and  
286 connective tissue was no separation as well. It is well established that tendons have  
287 high mobility relative to connective tissue and that the subsynovial fluid ensures  
288 minimal friction of the tendons against the connective tissue. No Separation type of  
289 contact ensures frictionless sliding of the two bodies and applies a restriction on  
290 rupture of the contact. However, during hand flexion and extension the tendons  
291 cannot always slide along the carpal tunnel without friction. The pressure between  
292 the connective tissue and the median nerve and tendon increases with flexion and  
293 extension of the hand. Thus, it is difficult to determine the friction coefficient  
294 between these tissues in vitro. To take this effect into account, finite-element  
295 calculations were performed with two types of tendons, connective tissue, and  
296 median nerve contact. Thus, the actual carpal tunnel strain values will be between  
297 the two boundary results with no separation contact type and with bonded contact  
298 type.

299 **Table 1. Solid bodies contact types.**

| <b>Solid body pair</b>                       | <b>Interaction / Contact type</b> |
|----------------------------------------------|-----------------------------------|
| Distal phalange to Middle phalange           | Revolute                          |
| Middle phalange to Proximal phalange         | Revolute                          |
| Proximal phalange to Metacarpal              | Revolute                          |
| Deep flexor tendon to Distal phalange        | Bonded                            |
| Superficial flexor tendon to Middle phalange | Bonded                            |

|                                                        |                        |
|--------------------------------------------------------|------------------------|
| Superficial and Deep flexor tendon to Annular ligament | No separation          |
| Superficial and Deep flexor tendon to SSCT             | No separation / Bonded |
| Median nerve to SSCT                                   | No separation / Bonded |
| Annular ligament to phalanges                          | Bonded                 |
| Transverse carpal ligament to SSCT                     | Bonded                 |

## 300 **Mechanical properties of the tissues**

301 The Ogden model [55] was used to describe the mechanical properties of the  
302 soft tissues. The model was chosen after a series of studies by the researchers [52–  
303 54] that experimentally determined the mechanical properties of all tissues within  
304 the carpal tunnel. The Ogden model was also used in these studies. The choice of  
305 this approach makes the calculations considerably more complicated, however, it  
306 allows to obtain results that are similar to the experimental data. thus, the soft  
307 tissues are modeled as isotropic linearly hyperelastic and the coefficients are shown  
308 in (Table 2). Bone deformation in flexion and extension of the hand is much less  
309 than soft tissue deformation. Thus, phalanges, carpal bones and metacarpal bones  
310 are modeled isotropic linearly elastic. Young's modulus and Poisson's coefficient  
311 of bone tissue are also shown in (Table 2) [70].

$$312 \quad W(\lambda_1, \lambda_2, \lambda_3) = \frac{2\mu}{\alpha^2} (\lambda_1^\alpha + \lambda_2^\alpha + \lambda_3^\alpha - 3). \quad (3)$$

313 **Table 2. Mechanical properties of the tissues used in model.**

| Tissues                         | Hyperelastic parameter |            | Reference                              |
|---------------------------------|------------------------|------------|----------------------------------------|
|                                 | $\alpha$               | $\mu$ [Pa] |                                        |
| Annular ligaments               | 10,9                   | 24900      | Main E.K. et al. [53]                  |
| Transverse ligament             | 10,9                   | 24900      | Main E.K. et al. [53]                  |
| Flexor digitorum deep tendon    | 8,89                   | 37600      | Main E.K. et al. [54]                  |
| Flexor digit superficial tendon | 8,89                   | 37600      | Main E.K. et al. [54]                  |
| Subsynovial connective tissue   | 4,51                   | 12500      | Matsuura Y. et al. [52]                |
| Median nerve                    | 6,5                    | 12900      | Main E.K. et al., Ma Z. et al. [54,71] |
| Elastic                         |                        |            |                                        |
|                                 | $\nu$                  | $E$ [MPa]  |                                        |

---

|                            |     |       |                        |
|----------------------------|-----|-------|------------------------|
| Phalanges and carpal bones | 0,3 | 10000 | Pistoia W. et al. [70] |
|----------------------------|-----|-------|------------------------|

---

314 **Boundary conditions**

315 The different hand movements are dealt with in the fifth stage of the approach.  
316 Human finger flexion is achieved by the finger flexor muscle actions and the effort  
317 transferred via tendons to the median nerve that passes through the carpal tunnel.  
318 The load from the tendons to the median nerve is transferred by the connective  
319 tissue inside the carpal tunnel, which surrounds both the tendons and the median  
320 nerve. The movement of the tendons defines the stresses in the carpal tunnel. In  
321 these conditions, it is important to consider the actual tendon movement caused by  
322 finger flexion. For this purpose, a three-dimensional model of the finger phalanges  
323 was built (Fig 2d) and the contact between the tendons and the phalanges was  
324 defined as bonded. The carpal bones were fixed laterally, the proximal tendon  
325 surface was displaced to simulate muscle contraction, the metacarpal bones were  
326 fixed and the proximal and distal areas of the median nerve were fixed as well. The  
327 rotation angle for each pair of phalanges was set according to the results obtained  
328 during the hand motion capture stage. The angles between each pair of phalanges  
329 were determined using the software developed so far.

330 The human hand movement at the wrist joint is similar to the movement of a  
331 spherical cylinder [72]. This study deals with flexion and extension of the wrist at  
332 the wrist joint as well. The wrist rotation angle during these movements is maximal  
333 and therefore the median nerve compression can be large. For this, the geometry of  
334 the patient's nine tendons, the median nerve and the connective tissue between them  
335 were reconstructed (Fig 2 a-c). To simulate hand flexion and extension in the wrist,  
336 a coordinate system attached to the geometric center of the carpal tunnel was



337 chosen. A rotation of 30 degrees around the Z-axis of the distal tendon surfaces and  
338 the medial nerve was applied. The direction of the Z axis was reversed for hand  
339 extension simulation.

340

## 341 **Nerve conduction**

342 The final stage of the approach is to determine the conduction of the deformed  
343 median nerve. When CTS occurs, the median nerve is compressed by the  
344 surrounding tissue and deformed. Nerve compression is the main cause of the CTS  
345 symptoms. Sensory and motor fibers are damaged as a result of compression. As a  
346 result, nerve fiber conduction is decreased or lost. The studies describe approaches  
347 to mathematical modelling of nerve conduction. The Hodgkin-Huxley (H-H)  
348 model [60], which describes the potential difference in the membrane potential of  
349 the giant squid axon, is considered a fundamental approach in this area. The model  
350 describes the Na and K ions behaviors, which produce the resting potential and the  
351 action potential. The model consists of a set of differential equations and is solved  
352 by the finite difference method. The distribution of the electrical signal in the  
353 cylinder is defined by the cable equation [62]. The extended cable equation gives  
354 consideration to the varying geometry of the cylinder.

## 355 **Hodgkin and Huxley model**

356 The H-H model was developed in 1952 as a result of Hodgkin's and Huxley's  
357 extensive studies of the giant axon of the squid. It describes how the action potential  
358 is initiated and how it propagates in a neuron [60]. In the H-H model, the nerve cell  
359 membrane is regarded as a flat capacitor. The potential difference on the coils of

360 the capacitor  $U$  is related to the stored charge  $Q$  and the total electrical capacitance  
361 of the membrane  $C$  by the relation:

$$362 \quad U = \frac{Q}{C}. \quad (4)$$

363 By differentiating this equation by time and denoting  $dQ/dt$  as the current flowing  
364 through the membrane, we obtain

$$365 \quad \frac{dU}{dt} = \frac{1}{C} \frac{dQ}{dt}. \quad (5)$$

366 By replacing  $U$  by the membrane potential  $E_m$  and replacing the total capacitance  
367 by the capacitance divided by the unit area and given that the main contributors to  
368 the generation of the nerve impulse are the potassium ion currents  $i_K$  and the sodium  
369 ion currents  $i_{Na}$ , we can simplify the equation:

$$370 \quad \frac{dE_m}{dt} = \frac{1}{c} (i_K + i_{Na}). \quad (6)$$

371 To solve the equation, it is necessary to find the dependence of specific currents  
372 through sodium and potassium ion channels on membrane potential. The  
373 relationship between electric current and potential can be described by the  
374 following equations:

$$375 \quad i_K = g_K (E_K - E_m), \quad (7)$$

$$376 \quad i_{Na} = g_{Na} (E_{Na} - E_m), \quad (8)$$

377 where,  $g_K$  and  $g_{Na}$  are not constants but functions of the membrane potential, which  
378 is due to the potential-dependent properties of the ion channels. In Hodgkin and  
379 Huxley, the dependence functions of  $g_K$  and  $g_{Na}$  on membrane potential have been  
380 determined on the basis of the analysis of the form of the experimental currents-

381 time dependences under different constant membrane potential values. Hodgkin  
 382 and Huxley showed that  $g_K$  and  $g_{Na}$  can be described by the equations:

$$383 \quad g_K = G_K n^4, \quad (9)$$

$$384 \quad g_{Na} = G_{Na} m^3 h, \quad (10)$$

385 where  $G_K$  and  $G_{Na}$  are maximum conductivities for potassium and sodium channels,  
 386  $n$  and  $m$  - activation gate variables for potassium and sodium channels;  $h$  -  
 387 inactivation gate variable for sodium channels.

388 The dynamics of gateway variables can be described by equations:

$$389 \quad \frac{dn}{dt} = \alpha_n (1 - n) - \beta_n n, \quad (11)$$

$$390 \quad \frac{dm}{dt} = \alpha_m (1 - m) - \beta_m m, \quad (12)$$

$$391 \quad \frac{dh}{dt} = \alpha_h (1 - h) - \beta_h h, \quad (13)$$

392 where  $\alpha$  and  $\beta$  are the rate parameters for the transition of the gate particle to the  
 393 «open» and «close» state, respectively. These constants also depend on the  
 394 membrane potential and are described by equations:

$$395 \quad \left\{ \begin{array}{l} \alpha_m = \frac{0.1(E_m + 40)}{1 - e^{-0.1(E_m + 40)}}, \quad \beta_m = 4e^{-0.0556(E_m + 65)}, \\ \alpha_n = \frac{0.01(E_m + 55)}{1 - e^{-0.1(E_m + 55)}}, \quad \beta_n = 0.125e^{-0.0125(E_m + 65)}, \\ \alpha_h = 0.07e^{-0.05(E_m + 65)}, \quad \beta_h = \frac{1}{1 + e^{-0.1(E_m + 35)}} \end{array} \right. \quad (14)$$

396 The system of equations (5)-(11) is a H-H model and is solved using a self-  
 397 developed code in Matlab using the finite difference method.

### 398 **Cable equation**

399 The cable theory is given as a second-order partial differential equation:

$$400 \quad C_m \frac{\partial E_m}{\partial t} = \frac{1}{R_e + R_i} \frac{\partial^2 E_m}{\partial z^2} + i_K + i_{Na}, \quad (15)$$

401 where  $R_e$  and  $R_i$  are extracellular and intracellular axial resistivity, respectively. The  
402 parameters used in the nerve conduction model are listed in (Table 3).

### 403 **Extended Cable Equation**

404 The effect of changes in nerve geometry on action potential propagation is  
405 accounted for by the extended cable equation.

$$406 \quad \left( C_m \frac{\partial E_m(z,t)}{\partial t} - I_{ion} \right) \frac{ds}{dz} = \frac{1}{R_e + R_i} \frac{dr}{dz} \frac{\partial E_m}{\partial z} + \frac{1}{2(R_e + R_i)} \frac{\partial^2 E_m}{\partial z^2}, \quad (16)$$

407 where,  $r$ ,  $z$  and  $s$  are coordinate variables describing the nerve shape and  $r(z) = A -$   
408  $Bz - Cz^2$  - the function describing the change in the shape of the neuron. Parameters  
409  $A$ ,  $B$ , and  $C$  are parameters taken from the results of finite-element modelling. The  
410 set of equations is solved by the finite difference method in the Matlab-based code.  
411 Conduction modelling was performed on three millimeters of the median nerve in  
412 the area of highest stress.

413

414

415 **Table 3. Parameters used in nerve conduction model.**

| Symbol   | Model parameters                   | Value                       |
|----------|------------------------------------|-----------------------------|
| $E_{Na}$ | Sodium potential                   | 52.4 mV                     |
| $E_K$    | Potassium potential                | -72.1 mV                    |
| $g_{Na}$ | Sodium conductance                 | 120.0m mho/cm <sup>2</sup>  |
| $g_K$    | Potassium conductance              | 36m mho/cm <sup>2</sup>     |
| $C_m$    | Membrane capacitance               | 1.0 $\mu$ F/cm <sup>2</sup> |
| $R_i$    | Resistivity of intracellular space | 35 $\Omega$ cm              |

---

|       |                                    |                |
|-------|------------------------------------|----------------|
| $R_e$ | Resistivity of extracellular space | 20 $\Omega$ cm |
|-------|------------------------------------|----------------|

---

416

417

## 418 **Results**

419 An MRI and CT of the left hand and carpal tunnel was performed. The results  
420 obtained in DICOM files were used to construct a patient-specific three-  
421 dimensional geometry of the investigated tissues (Fig 2). Finger flexion and  
422 extension were captured and processed using the software developed. Patient-  
423 specific movement of fingers and hand is necessary to set the boundary conditions  
424 objectively in FEM. The motion capture process and its results are shown in (Fig  
425 3). The resulting time dependencies of the rotation angles between the phalanges  
426 were used in FEM to assess the effect of finger flexion on median nerve  
427 compression. Six series of hand motion captures are shown in (Fig 4). The graphs  
428 show changes in the angle of the three phalanges over time during index finger  
429 flexion. Blue shows angle change in distal interphalangeal joint, red shows angle  
430 change in proximal interphalangeal joint, green shows angle change in metacarpal  
431 phalangeal joint. The maximum distal - middle phalanges angle was 61°, maximum  
432 middle – proximal phalanges angle was 116°, maximum proximal phalanges –  
433 metacarpals angle was 101°.

434

435

436

437 **Fig 4.** Change of angles in the three joints of the index finger over time obtained by  
438 motion capture: a-e series number from one to six.

439

440

## 441 **Fingers flexion**

442 Stress, displacement and strain values were obtained in all modelled tissues  
443 during finger flexion. The results of the total deformations at various modelling  
444 times ( $t=3s$ ,  $t=15s$ ,  $t=25s$ ,  $t=35s$ ) during finger flexion are shown in (Fig. 5). The  
445 maximum stresses do not always clearly describe the stress state of the soft tissues,  
446 especially close to the fixed areas. In this case, Von Mises stress along the midline  
447 of the tendon and median nerve were analyzed. The midline was constructed based  
448 on a set of midpoints of the tendon cross sections. However, the maximum von  
449 Mises stress is shown in (Table 4). Tendons were divided into two groups: deep and  
450 superficial. The thumb tendon is shown in both groups. Stress distribution along the  
451 tendon's midline as a function of distance is shown in (Fig 6). The distal plane of  
452 the tendon is taken as the start of the distance report.

453

454

455 **Fig 5.** Total deformation during finger flexion: (a)  $t = 3s$ , (b)  $t=15s$ , (c),  $t= 25s$ , (d)  $t=35s$ .

456

457

458 **Fig 6.** Tendons stress along tendon length (midline) during finger flexion: (a) superficial  
459 tendons, (b) deep tendons

460

461

## 462 **Wrist flexion and extension**

463 Total deformation of tendons, median nerve, and connective tissue (hand is  
464 hide to focus on carpal tunnel) during flexion and extension of the hand with bonded  
465 contact is shown in (Fig 7, 8 at various modelling time  $t=1s$ ,  $t=15s$ ). Two types of

466 tendons and connective tissue connections were considered during wrist flexion and  
467 extension. Stress along the midline of the tendon is shown in (Fig 9-12). Tendons  
468 were divided into two groups (deep and superficial), similar to the results for finger  
469 flexion. The thumb tendon is included in both groups as well. Results are shown  
470 for two types of contact for each tendon.

471  
472 **Fig 7.** Total deformation during wrist flexion: (a)  $t = 1s$ , (b)  $t=15s$ .

473  
474  
475 **Fig 8.** Total deformation during wrist extension: (a)  $t = 1s$ , (b)  $t=15s$ .

476  
477  
478 **Fig 9.** Stress in the tendons during wrist extension with bonded contact type along  
479 midline: (a) superficial tendons, (b) deep tendons.

480  
481  
482 **Fig 10.** Stress in the tendons during wrist extension with no separation contact type along  
483 midline: (a) superficial tendons, (b) deep tendons.

484  
485  
486 **Fig 11.** Stress in the tendons during wrist flexion with bonded contact type along midline:  
487 (a) superficial tendons, (b) deep tendons

488  
489  
490 **Fig 12.** Stress in the tendons during wrist flexion with no separation contact type along  
491 midline: (a) superficial tendons, (b) deep tendons.

492  
493  
494 Finger joint flexion angles are usually determined by external factors. For  
495 example, in the movement of the shoulder or forearm, in various tissue injuries of  
496 the upper extremity or in neurophysiological disorders [73–75]. J.W. Lee and K.S.

497 Lee in their studies also used the motion capture method and the results were the  
498 same as the results of this study [76,77]. They revealed a non-linear character of  
499 fingers flexion angle plots, which was approved here also.

500  
501

## 502 **Median nerve stress during finger flexion and wrist** 503 **flexion/extension**

504 Stress in the median nerve during finger flexion and during wrist flexion and  
505 extension was obtained according to the rotation angle of the respective phalanges.  
506 The human finger flexes in three joints: the joint between the distal phalanx and the  
507 middle phalanx (distal interphalangeal joint), the joint between the middle phalanx  
508 and the proximal phalanx (proximal interphalangeal joint) and the joint between the  
509 proximal phalanx and the metacarpal bones (metacarpal phalangeal joint). The  
510 angles at these joints are determined using motion capture in the third stage of this  
511 approach. To present the results, the maximum tension in the median nerve was  
512 presented as a function of the angle in the proximal interphalangeal joint. According  
513 to the results based on the hand motion capture, the angle in this joint changes faster  
514 than the others. The results of maximum median nerve stress during flexion and  
515 extension of the wrist are shown as a function of the angle of rotation at the wrist  
516 joint. Results presented for two types of connective tissue-tendon contact (Fig 13).  
517 Wrist flexion and extension was performed at 30 degrees, finger flexion was  
518 performed at 70 degrees. For convenience of comparison, the graph is shown up to  
519 30 degrees. The median nerve stress changes further during finger flexion are close  
520 to linear.

521



522  
523  
524  
525  
526  
527  
528  
529

**Fig 13.** Relationship between maximum stresses in the median nerve and angle of rotation during finger flexion and wrist flexion/extension.

530

**Table 4. Maximum von Mises stress on the tendons during hand movements**

| Movement type                   | Maximum Von Misses stress, Pa | Maximum Von Misses stress location |
|---------------------------------|-------------------------------|------------------------------------|
| Finger flexion                  | 4056                          | Pinky deep                         |
| Wrist flexion (Bonded)          | 15568                         | Middle deep                        |
| Wrist flexion (No separation)   | 8415                          | Middle deep                        |
| Wrist extension (Bonded)        | 16506                         | Middle deep                        |
| Wrist extension (No separation) | 8530                          | Thumb                              |

531

## Modelling of median nerve conduction during finger

532

### flexion and wrist flexion/extension

533

The shape change of the median nerve is accounted for by the function

534

$r(z) = A - Bz - Cz^2$ . By describing the shape of the median nerve during finger flexion

535

and hand flexion and extension, coefficients  $A$ ,  $B$  and  $C$  were obtained. The shape

536

of the hand in flexion and extension appeared to be the same. The coefficient  $C$  is

537

responsible for the non-linear curvature of the median nerve surface. In the finite

538

element analysis, the shape of the median nerve was changed only linearly, so that

539

coefficient  $C = 0$  and coefficients  $A$  and  $B$  were 0.01 and 80 for finger flexion and

540

0.01 and 20 for hand flexion, respectively. The dependence of the membrane

541 potential of the deformed median nerve on time at its various areas is shown at (Fig  
542 14).

543  
544  
545  
546  
547  
548

**Fig 14.** Dependence of the membrane potential of the deformed median nerve on time at its various areas: (a) – finger flexion (b) – wrist flexion.

## 549 Discussion

550 The aim of this work was to create and apply a technique for early diagnosis  
551 of carpal tunnel syndrome. This study combines MRI / FEM / motion capture  
552 techniques to simulate carpal tunnel syndrome more precisely.

553 Stress was obtained in the median nerve and tendons during finger flexion  
554 and during flexion and extension of the hand. The loads in the carpal tunnel caused  
555 by finger flexion and extension were shown to be lower than those caused by hand  
556 flexion and extension [50,78,79]. The tendons slide along the median nerve and  
557 barely press on the nerve when fingers are flexed. However, when flexing and  
558 extending the hand, the tendons bend along the carpal tunnel and press on the  
559 median nerve [80]. Because the pinky tendons bend more than other tendons in the  
560 carpal canal due to a reduction in the cross-sectional area of the carpal tunnel, they  
561 experience higher stress during finger flexion than other tendons [81]. Fig 5 shows  
562 that the maximum stress values in the tendons are predominantly in the middle of  
563 the carpal tunnel. Low stress values in the tendons of the middle finger are related  
564 to the median nerve being located near them and the load is transferred to the nerve.  
565 The total tension of the deep tendons is 10% higher than the superficial tendons.  
566 This is due to the deep tendons of the fingers are more stretched than the superficial  
567 tendons [82,83].

568 Two contact types between tendons and connective tissue were considered  
569 during hand flexion and extension. The first type was an inseparable connection of  
570 tissues (bonded), the second type allowed the tissues to slide relative to each other,  
571 but at the same time without detaching (no separation). In this case, the results  
572 enable to analyze the difference in contact types and the difference in flexion and  
573 extension of the hand. The difference between hand flexion and extension with the  
574 bonded connection type was 5.74%. The difference between hand flexion and  
575 extension with the no separation connection type was 3.1%. It can be said that the  
576 tendon tension during hand flexion and extension is insufficient [84,85]. This can  
577 also be noted in the results of the median nerve tension of (Fig 14). The graph shows  
578 that the flexion of the hand and the extension differ slightly. However, the  
579 difference between the contact types was 31.7% for hand extension and 59.9% for  
580 hand flexion. This suggests a strong influence of the type of contact between the  
581 tendon and the connective tissue [86,87]. In clinical practice, an increase in carpal  
582 tunnel pressure may indicate an increase in tendon sliding friction coefficient along  
583 the carpal tunnel [88,89]. This manifestation can be a consequence of a lack of  
584 vitamins in the body or a metabolic disorder [90]. In almost all cases, the maximum  
585 stress was in the index finger tendons. This may be due to the increased size of the  
586 tendons caused by frequent movements of the patient's index finger. The results  
587 obtained for stress in the tendons correspond to the values obtained in a recent paper  
588 by Lv. Y. et. al [43].

589 The maximum von Mises stress in the median nerve during flexion/extension  
590 of the hand are significantly higher than during finger flexion. When the fingers  
591 were flexed at 30 degrees, the median nerve stress was 177 Pa; when the hand was

592 flexed and extended at 30 degrees with the Bonded contact type, it was 3364.3 and  
593 3087 Pa, respectively; when the hand was flexed and extended at 30 degrees with  
594 the no separation contact type, it was 1143 and 1174 Pa, respectively. The loads  
595 acting on the median nerve were experimentally determined in the studies [91–93]  
596 and coincide with the results obtained in this article. In this method, the median  
597 nerve conduction depends on the electrophysiological parameters of the H-H model  
598 and the conduction equation, as well as on the shape of the median nerve described  
599 by the function  $r(z)$ . Thus, conduction during finger flexion is attenuated along the  
600 length of the tendon slower than during flexion and extension of the hand [94,95].

601 This technique currently has no criteria for determining the presence or  
602 absence of carpal tunnel syndrome, because the method was tested on a completely  
603 healthy middle-aged woman who does not have carpal tunnel syndrome. Similar  
604 studies on a group of patients are needed to create an accurate criterion. However,  
605 this paper shows all the stages of the developed approach and shows the result of  
606 its work on a person.

607 The finite element method has many varying parameters that can greatly  
608 affect the obtained results. In that case, a comparison of results with experimental  
609 data is necessary. Gelberman et. al., Szabo et. al., Werner et. al., Rojviroj et. al.,  
610 Hamanaka et. al. and Goss et. al. in their studies [91,96–101] presented results of  
611 experimental intracarpal pressure determination. Comparison of the results  
612 obtained in this study with the relevant experimental results from these works are  
613 presented in (Table 5). However, the experimental technique of pressure  
614 determination in the carpal tunnel allows to determine the fluid pressure within the  
615 carpal tunnel. The technique used in this study allows to determine the stress of all

616 carpal tunnel tissues. In this case, the tendon and median nerve stress can be very  
 617 different. Tendon stress correlates better with experimental data than median nerve  
 618 stress. However, in some cases, a good correlation with median nerve tension was  
 619 also shown. In this work, a healthy patient without carpal tunnel syndrome was  
 620 examined according to the approach. Experimental studies most often focus on  
 621 patients with carpal tunnel syndrome. Mouzakis et. al. and Lv et. al. in their studies  
 622 [43,46] determined the stress in the tissues of the carpal tunnel also by the finite  
 623 element method. Mouzakis et. et al. determined the stress of all tissues of the carpal  
 624 tunnel during mouse and keyboard operation. Lv et. al. determined the stress in the  
 625 finger flexor tendons.

626 **Table 5. Comparison of results with other studies**

| Study                       | Hand position   | Intercarpal Stress, Pa | Relevant parameter in this study |            |
|-----------------------------|-----------------|------------------------|----------------------------------|------------|
|                             |                 |                        | Median nerve                     | Tendon     |
| Gelberman et. al. 1981 [91] | Neutral         | 300                    | 500                              | 300 – 1600 |
|                             | Writ flexion    | 4300                   | 3400                             | 250 – 4300 |
|                             | Wrist extension | 4000                   | 3100                             | 150 – 5500 |
| Szabo et. al. 1989 [96]     | Neutral         | 700                    | 500                              | 300 – 1600 |
|                             | Writ flexion    | 2100                   | 3400                             | 250 – 4300 |
|                             | Wrist extension | 3600                   | 3100                             | 150 – 5500 |
| Werner et. al. 1983 [97]    | Wrist flexion   | 270 – 1300             | 3400                             | 250 – 4300 |
|                             | Wrist extension | 670 – 6700             | 3100                             | 150 – 5500 |
| Rojviroj et. al. 1990 [98]  | Neutral         | 453                    | 500                              | 300 – 1600 |
|                             | Writ flexion    | 4350                   | 3400                             | 250 – 4300 |
|                             | Wrist extension | 3540                   | 3100                             | 150 – 5500 |
| Hamanaka et. al. 1995 [99]  | Neutral         | 2533 – 8000            | 500                              | 300 – 1600 |
|                             | Flexion         | 665 – 22264            | 3100 – 3400                      | 16500      |
| Goss et. al. 2009 [100]     | Finger flexion  | 1200 – 7460            | 500                              | 1600       |
| Kanta et. al. 2009 [101]    | Finger flexion  | 1300 – 6600            | 500                              | 1600       |
|                             | Writ flexion    | 4000 – 10600           | 3400                             | 250 – 4300 |
|                             | Wrist extension | 5300 – 18600           | 3100                             | 150 – 5500 |

|                             |                      |                          |                                         |             |
|-----------------------------|----------------------|--------------------------|-----------------------------------------|-------------|
| Uchiyama et. al. 2010 [102] | Neutral              | 800 – 11400              | 500                                     | 300 – 1600  |
| Mouzakis et. al. 2014 [46]  | Mouse and keyboard   | 2266 and 3999            | 3100 – 3400                             | 4300 – 5500 |
| <b>Study</b>                | <b>Hand position</b> | <b>Tendon Stress, Pa</b> | <b>Relevant parameter in this study</b> |             |
| Lv et. al. 2022 [43]        | Finger flexion       | 9000 – 23000             | 16500                                   |             |

## 627 **Limitations**

628           The construction of patient-specific geometry is associated with subjective  
629 factors. The choice of the MRI method of operation and the processing of the  
630 resulting geometry may lead to minor changes in the calculation results.  
631 Nevertheless, in this paper, the construction of an ideal personal geometry may be  
632 a limitation.

633           When using the FEM, it is necessary to set the mechanical parameters of the  
634 studied tissues. In this paper, these parameters were taken from the experimental  
635 work of other authors. Although these parameters may be different for different  
636 people, and may also change during life. Determining these parameters in a live  
637 person is difficult at the moment. The choice of mechanical parameters of the  
638 simulated tissues is a limitation of the proposed technique. Nevertheless, these  
639 parameters can be determined experimentally in cadavers and the results obtained  
640 can be divided into groups. For example, the parameters that characterize men and  
641 women, and also divide these groups by age. This may be a further line of research.

642           The rotation axis location during hand flexion and extension in this study was  
643 made on the geometry of the carpal tunnel. Although, during hand flexion, the  
644 connected to each other by ligaments carpal bones move. Bone-ligamentous

645 complex determines the axis of rotation of the hand. In this case, the location of the  
646 axis of rotation may change. Determining the rotation axis during flexion and  
647 extension of the hand can also be a direction of further research.

648

## 649 **Conclusions**

650 This study presents a six–stage combined approach for the early diagnosis of  
651 carpal tunnel syndrome. Each stage aims to improve understanding of the  
652 mechanical and neurophysiological factors influencing the development of carpal  
653 tunnel syndrome. The finite element method is used to determine the mechanical  
654 stress in the carpal tunnel. MRI and CT scans of the patient's hand were used to  
655 create the patient–specific geometry. Software has been created to capture hand  
656 motion and is used to determine the personal movement of the patient's fingers and  
657 hand. The obtained stress–strain state of the median nerve is used to model the  
658 conductivity of the electrical impulse along the median nerve. The Hodgkin and  
659 Huxley model and the extended cable equation describe nerve conduction in this  
660 approach. The results showed that compression of the median nerve is highly  
661 affected by the contact condition of the tendon and connective tissue. It has been  
662 shown that hand flexion reduces conduction in the median nerve more than finger  
663 flexion. The developed approach can be introduced into medical practice to  
664 improve the quality for early diagnostics of the carpal tunnel syndrome.

665

## 666 Acknowledgements

667 This work was supported by Russian Science Foundation and Perm Region  
668 (No. 22–21–20067, <https://rscf.ru/en/project/22–21–20067>).

669  
670  
671

## 672 References

- 673 1. Núñez-Cortés R, Cruz-Montecinos C, Torreblanca-Vargas S, Andersen LL,  
674 Tapia C, Ortega-Palavecinos M, et al. Social determinants of health and physical  
675 activity are related to pain intensity and mental health in patients with carpal  
676 tunnel syndrome. *Musculoskelet Sci Pract.* 2023;63.  
677 doi:10.1016/j.msksp.2023.102723
- 678 2. Bickel KD. Carpal Tunnel Syndrome. *J Hand Surg Am.* 2010;35: 147–152.  
679 doi:10.1016/j.jhsa.2009.11.003
- 680 3. Sousa RL, Moraes VY de, Zobiolo AF, Nakachima LR, Belloti JC. Diagnostic  
681 criteria and outcome measures in randomized clinical trials on carpal tunnel  
682 syndrome: a systematic review. *Sao Paulo Med J.* 2023;141: e2022086.  
683 doi:10.1590/1516-3180.2022.0086.07022023
- 684 4. Nazari G, Shah N, MacDermid JC, Woodhouse L. The Impact of Sensory, Motor  
685 and Pain Impairments on Patient- Reported and Performance Based Function in  
686 Carpal Tunnel Syndrome. *Open Orthop J.* 2017;11.  
687 doi:10.2174/1874325001711011258
- 688 5. Wipperman J, Goerl K. Diagnosis and management of carpal tunnel syndrome. *J*  
689 *Musculoskelet Med.* 2016;94: 47–60.
- 690 6. Nora DB, Becker J, Ehlers JA, Gomes I. What symptoms are truly caused by  
691 median nerve compression in carpal tunnel syndrome? *Clin Neurophysiol.*  
692 2005;116. doi:10.1016/j.clinph.2004.08.013
- 693 7. Nunez F, Vranceanu AM, Ring D. Determinants of pain in patients with carpal  
694 tunnel syndrome. *Clin Orthop Relat Res.* 2010;468: 3328–3332.  
695 doi:10.1007/s11999-010-1551-x
- 696 8. Zuniga AF, Keir PJ. Diagnostic and research techniques in carpal tunnel  
697 syndrome. *Crit Rev Biomed Eng.* 2019;47.  
698 doi:10.1615/CritRevBiomedEng.2020030827



- 699 9. Dabbagh A, Ziebart C, MacDermid JC. Accuracy of diagnostic clinical tests and  
700 questionnaires in screening for carpal tunnel syndrome among workers- A  
701 systematic review. *J Hand Ther.* 2021;34. doi:10.1016/j.jht.2021.04.003
- 702 10. Elseddik M, Mostafa RR, Elashry A, El-Rashidy N, El-Sappagh S, Elgamal S, et  
703 al. Predicting CTS Diagnosis and Prognosis Based on Machine Learning  
704 Techniques. *Diagnostics.* 2023;13: 1–18. doi:10.3390/diagnostics13030492
- 705 11. Drăghici NC, Leucuța DC, Ciobanu DM, Stan AD, Lupescu TD, Mureșanu DF.  
706 Clinical Utility of Boston-CTS and Six-Item CTS Questionnaires in Carpal  
707 Tunnel Syndrome Associated with Diabetic Polyneuropathy. *Diagnostics.*  
708 2023;13. doi:10.3390/diagnostics13010004
- 709 12. Levine DW, Simmons BP, Koris MJ, Daltroy LH, Hohl GG, Fossel AH, et al. A  
710 self-administered questionnaire for the assessment of severity of symptoms and  
711 functional status in carpal tunnel syndrome. *J Bone Jt Surg.* 1993;75.  
712 doi:10.2106/00004623-199311000-00002
- 713 13. Greenslade JR, Mehta RL, Belward P, Warwick DJ. Dash and boston  
714 questionnaire assessment of carpal tunnel syndrome outcome: What is the  
715 responsiveness of an outcome questionnaire? *J Hand Surg Am.* 2004;29 B.  
716 doi:10.1016/j.jhsb.2003.10.010
- 717 14. Chung KC, Hamill JB, Walters MR, Hayward RA. The Michigan hand outcomes  
718 questionnaire (MHQ): Assessment of responsiveness to clinical change. *Ann  
719 Plast Surg.* 1999;42. doi:10.1097/00000637-199906000-00006
- 720 15. Pransky G, Feuerstein M, Himmelstein J, Katz JN, Vickers-Lahti M. Measuring  
721 functional outcomes in work-related upper extremity disorders: Development and  
722 validation of the upper extremity function scale. *J Occup Environ Med.* 1997;39.  
723 doi:10.1097/00043764-199712000-00014
- 724 16. Leite JCDC, Jerosch-Herold C, Song F. A systematic review of the psychometric  
725 properties of the Boston Carpal Tunnel Questionnaire. *BMC Musculoskeletal  
726 Disorders.* 2006. doi:10.1186/1471-2474-7-78
- 727 17. Franchignoni F, Vercelli S, Giordano A, Sartorio F, Bravini E, Ferriero G.  
728 Minimal clinically important difference of the disabilities of the arm, shoulder  
729 and hand outcome measure (DASH) and its shortened version (quickDASH). *J  
730 Orthop Sports Phys Ther.* 2014;44. doi:10.2519/jospt.2014.4893
- 731 18. Crisp AH, Jones MG, Slater P. The Middlesex Hospital Questionnaire: A validity  
732 study. *Br J Med Psychol.* 1978;51. doi:10.1111/j.2044-8341.1978.tb02472.x
- 733 19. Ito M, Bentley KH, Oe Y, Nakajima S, Fujisato H, Kato N, et al. Assessing  
734 depression related severity and functional impairment(warning) the Overall  
735 Depression Severity and Impairment Scale (ODSIS). *PLoS One.* 2015;10.  
736 doi:10.1371/journal.pone.0122969
- 737 20. Sambandam SN, Priyanka P, Gul A, Ilango B. Critical analysis of outcome

- 738 measures used in the assessment of carpal tunnel syndrome. *Int Orthop*. 2008;32.  
739 doi:10.1007/s00264-007-0344-7
- 740 21. Zhang D, Chruscielski CM, Blazar P, Earp BE. Accuracy of Provocative Tests  
741 for Carpal Tunnel Syndrome. *J Hand Surg Glob Online*. 2020;2.  
742 doi:10.1016/j.jhsg.2020.03.002
- 743 22. Dabbagh A, MacDermid JC, Yong J, Packham TL, Macedo LG, Ghodrati M.  
744 Diagnostic accuracy of sensory and motor tests for the diagnosis of carpal tunnel  
745 syndrome: a systematic review. *BMC Musculoskelet Disord*. 2021;22.  
746 doi:10.1186/s12891-021-04202-y
- 747 23. Agarwal V, Singh R, Sachdev A, Wiclaff, Shekhar S, Goel D. A prospective  
748 study of the long-term efficacy of local methyl prednisolone acetate injection in  
749 the management of mild carpal tunnel syndrome. *Rheumatology*. 2005;44.  
750 doi:10.1093/rheumatology/keh571
- 751 24. Liu D, Ahmet A, Ward L, Krishnamoorthy P, Mandelcorn ED, Leigh R, et al. A  
752 practical guide to the monitoring and management of the complications of  
753 systemic corticosteroid therapy. *Allergy, Asthma and Clinical Immunology*.  
754 2013. doi:10.1186/1710-1492-9-30
- 755 25. Osiak K, Mazurek A, Pękala P, Koziej M, Walocha JA, Pasternak A.  
756 Electrodiagnostic studies in the surgical treatment of carpal tunnel syndrome—a  
757 systematic review. *Journal of Clinical Medicine*. 2021. doi:10.3390/jcm10122691
- 758 26. Jablecki CK, Andary MT, Floeter MK, Miller RG, Quartly CA, Vennix MJ, et al.  
759 Practice parameter: Electrodiagnostic studies in carpal tunnel syndrome: Report  
760 of the American Association of Electrodiagnostic Medicine, American Academy  
761 of Neurology, and the American Academy of Physical Medicine and  
762 Rehabilitation. *Neurology*. 2002;58. doi:10.1212/WNL.58.11.1589
- 763 27. Witt JC, Hentz JG, Stevens JC. Carpal tunnel syndrome with normal nerve  
764 conduction studies. *Muscle and Nerve*. 2004;29. doi:10.1002/mus.20019
- 765 28. Park JS, Won HC, Oh JY, Kim DH, Hwang SC, Yoo J Il. Value of cross-  
766 sectional area of median nerve by MRI in carpal tunnel syndrome. *Asian J Surg*.  
767 2020;43. doi:10.1016/j.asjsur.2019.08.001
- 768 29. McDonagh C, Alexander M, Kane D. The role of ultrasound in the diagnosis and  
769 management of carpal tunnel syndrome: A new paradigm. *Rheumatol (United  
770 Kingdom)*. 2014;54: 9–19. doi:10.1093/rheumatology/keu275
- 771 30. Lam KHS, Wu Y-T, Reeves KD, Galluccio F, Allam AE-S, Peng PWH.  
772 Ultrasound-Guided Interventions for Carpal Tunnel Syndrome: A Systematic  
773 Review and Meta-Analyses. *Diagnostics*. 2023;13.  
774 doi:10.3390/diagnostics13061138
- 775 31. Atroshi I, Gummesson C, Johnsson R, Ornstein E, Ranstam J, Rosen I.  
776 [Prevalence for clinically proved carpal tunnel syndrome is 4 percent].

- 777 Lakartidningen. 2000;97.
- 778 32. Musculoskeletal Ultrasonography in Rheumatic Diseases. Musculoskeletal  
779 Ultrasonography in Rheumatic Diseases. 2015. doi:10.1007/978-3-319-15723-8
- 780 33. Byra M, Hentzen E, Du J, Andre M, Chang EY, Shah S. Assessing the  
781 Performance of Morphologic and Echogenic Features in Median Nerve  
782 Ultrasound for Carpal Tunnel Syndrome Diagnosis. *J Ultrasound Med.* 2020;39.  
783 doi:10.1002/jum.15201
- 784 34. Kuo TT, Lee MR, Liao YY, Chen JP, Hsu YW, Yeh CK. Assessment of median  
785 nerve mobility by ultrasound dynamic imaging for diagnosing carpal tunnel  
786 syndrome. *PLoS One.* 2016;11. doi:10.1371/journal.pone.0147051
- 787 35. Kanagasabai K. Ultrasound of Median Nerve in the Diagnosis of Carpal Tunnel  
788 Syndrome-Correlation with Electrophysiological Studies. *Indian J Radiol*  
789 *Imaging.* 2022;32. doi:10.1055/s-0041-1741088
- 790 36. Cebra JR, Lhner R. From medical images to anatomically accurate finite element  
791 grids. *Int J Numer Methods Eng.* 2001;51. doi:10.1002/nme.205
- 792 37. Peshin SE, Karakulova YV, Nyashin YI, Nyashin MM. Carpal tunnel syndrome  
793 in terms of biomechanics. Literature review. *Russ J Biomech.* 2022;26: 9–13.  
794 Available: [https://vestnik.pstu.ru/biomech/archives/?id=&folder\\_id=10825](https://vestnik.pstu.ru/biomech/archives/?id=&folder_id=10825)
- 795 38. Ko C, Brown TD. A fluid-immersed multi-body contact finite element  
796 formulation for median nerve stress in the carpal tunnel. *Comput Methods*  
797 *Biomech Biomed Engin.* 2007;10. doi:10.1080/10255840701430480
- 798 39. Guo X, Fan Y, Li ZM. Three dimensional finite element analysis on the  
799 morphological change of the transverse carpal ligament. 2007 IEEE/ICME  
800 International Conference on Complex Medical Engineering, CME 2007. 2007.  
801 doi:10.1109/ICME.2007.4382071
- 802 40. Wei Y, Zou Z, Wei G, Ren L, Qian Z. Subject-Specific Finite Element Modelling  
803 of the Human Hand Complex: Muscle-Driven Simulations and Experimental  
804 Validation. *Ann Biomed Eng.* 2020;48. doi:10.1007/s10439-019-02439-2
- 805 41. Perevoshchikova N, Moerman KM, Akhbari B, Bindra R, Maharaj JN, Lloyd  
806 DG, et al. Finite element analysis of the performance of additively manufactured  
807 scaffolds for scapholunate ligament reconstruction. *PLoS One.* 2021;16.  
808 doi:10.1371/journal.pone.0256528
- 809 42. Henderson J, Thoreson A, Yoshii Y, Zhao KD, Amadio PC, An KN. Finite  
810 element model of subsynovial connective tissue deformation due to tendon  
811 excursion in the human carpal tunnel. *J Biomech.* 2011;44.  
812 doi:10.1016/j.jbiomech.2010.09.001
- 813 43. Lv Y, Zheng Q, Chen X, Hou C, An M. Analysis on synergistic cocontraction of  
814 extrinsic finger flexors and extensors during flexion movements: A finite element

- 815 digital human hand model. PLoS One. 2022;17: 1–15.  
816 doi:10.1371/journal.pone.0268137
- 817 44. Yao Y, Erdemir A, Li ZM. Finite element analysis for transverse carpal ligament  
818 tensile strain and carpal arch area. J Biomech. 2018;73.  
819 doi:10.1016/j.jbiomech.2018.04.005
- 820 45. Chang CT, Chen YH, Lin CCK, Ju MS. Finite element modeling of hyper-  
821 viscoelasticity of peripheral nerve ultrastructures. J Biomech. 2015;48.  
822 doi:10.1016/j.jbiomech.2015.04.004
- 823 46. Mouzakis DE, Rachiotis G, Zaoutsos S, Eleftheriou A, Malizos KN. Finite  
824 element simulation of the mechanical impact of computer work on the carpal  
825 tunnel syndrome. J Biomech. 2014;47. doi:10.1016/j.jbiomech.2014.07.004
- 826 47. Javanmardian A, HaghPanahi M. 3 dimensional finite element analysis of the  
827 human wrist joint without ligaments under compressive loads. 2010 17th Iranian  
828 Conference of Biomedical Engineering, ICBME 2010 - Proceedings. 2010.  
829 doi:10.1109/ICBME.2010.5704996
- 830 48. Oflaz H, Gunal I. Maximum loading of carpal bones during movements: a finite  
831 element study. Eur J Orthop Surg Traumatol. 2019;29. doi:10.1007/s00590-018-  
832 2287-7
- 833 49. Yokota H, Yasui M, Hirai S, Hatayama N, Ohshima S, Nakano T, et al.  
834 Evaluation of the pressure on the dorsal surface of the distal radius using a  
835 cadaveric and computational model: clinical considerations in intersection  
836 syndrome and Colles' fracture. Anat Sci Int. 2020;95. doi:10.1007/s12565-019-  
837 00491-5
- 838 50. Peshin S, Karakulova Y, Kuchumov AG. Finite Element Modeling of the Fingers  
839 and Wrist Flexion/Extension Effect on Median Nerve Compression. Appl Sci.  
840 2023;13. doi:10.3390/app13021219
- 841 51. Osamura N, Zhao C, Zobitz ME, An KN, Amadio PC. Evaluation of the material  
842 properties of the subsynovial connective tissue in carpal tunnel syndrome. Clin  
843 Biomech. 2007;22. doi:10.1016/j.clinbiomech.2007.07.009
- 844 52. Matsuura Y, Thoreson AR, Zhao C, Amadio PC, An KN. Development of a  
845 hyperelastic material model of subsynovial connective tissue using finite element  
846 modeling. J Biomech. 2016;49. doi:10.1016/j.jbiomech.2015.09.048
- 847 53. Main EK, Goetz JE, Baer TE, Klocke NF, Brown TD. Volar/dorsal compressive  
848 mechanical behavior of the transverse carpal ligament. J Biomech. 2012;45.  
849 doi:10.1016/j.jbiomech.2012.01.048
- 850 54. Main EK, Goetz JE, James Rudert M, Goreham-Voss CM, Brown TD. Apparent  
851 transverse compressive material properties of the digital flexor tendons and the  
852 median nerve in the carpal tunnel. J Biomech. 2011;44.  
853 doi:10.1016/j.jbiomech.2010.12.005

- 854 55. Ogden R. Non-linear elastic deformations. *Eng Anal Bound Elem.* 1984;1.  
855 doi:10.1016/0955-7997(84)90049-3
- 856 56. Lundborg G, Gelberman RH, Minteer-Convery M, Lee YF, Hargens AR. Median  
857 nerve compression in the carpal tunnel—Functional response to experimentally  
858 induced controlled pressure. *J Hand Surg Am.* 1982;7. doi:10.1016/S0363-  
859 5023(82)80175-5
- 860 57. Rempel D, Dahlin L, Lundborg G. Pathophysiology of nerve compression  
861 syndromes: Response of peripheral nerves to loading. *Journal of Bone and Joint*  
862 *Surgery.* 1999. doi:10.2106/00004623-199911000-00013
- 863 58. Topp KS, Boyd BS. Structure and biomechanics of peripheral nerves: Nerve  
864 responses to physical stresses and implications for physical therapist practice.  
865 *Physical Therapy.* 2006. doi:10.1093/ptj/86.1.92
- 866 59. Mittal P, Shenoy S, Sandhu JS. Effect of different cuff widths on the motor nerve  
867 conduction of the median nerve: An experimental study. *J Orthop Surg Res.*  
868 2008;3. doi:10.1186/1749-799X-3-1
- 869 60. Hodgkin A, Huxley A. A quantitative description of membrane current and its  
870 application to conductance and excitation. *J Physiol.* 1952;117: 500–44.
- 871 61. FitzHugh R. Impulses and Physiological States in Theoretical Models of Nerve  
872 Membrane. *Biophys J.* 1961;1. doi:10.1016/S0006-3495(61)86902-6
- 873 62. Plonsey R, Barr RC. Bioelectricity: A quantitative approach. *Bioelectricity: A*  
874 *Quantitative Approach.* 2007. doi:10.1007/978-0-387-48865-3
- 875 63. Jérusalem A, García-Grajales JA, Merchán-Pérez A, Peña JM. A computational  
876 model coupling mechanics and electrophysiology in spinal cord injury. *Biomech*  
877 *Model Mechanobiol.* 2014;13. doi:10.1007/s10237-013-0543-7
- 878 64. Tekieh T, Shahzadi S, Rafii-Tabar H, Sasanpour P. Are deformed neurons  
879 electrophysiologically altered? A simulation study. *Curr Appl Phys.* 2016;16:  
880 1413–1417. doi:10.1016/j.cap.2016.07.012
- 881 65. Cavarretta F, Naldi G. Mathematical study of a nonlinear neuron model with  
882 active dendrites. *AIMS Math.* 2019;4. doi:10.3934/math.2019.3.831
- 883 66. Tian J, Huang G, Lin M, Qiu J, Sha B, Lu TJ, et al. A mechano-electrical coupling  
884 model of neurons under stretching. *J Mech Behav Biomed Mater.* 2019;93.  
885 doi:10.1016/j.jmbbm.2019.02.007
- 886 67. Wu YT, Gilpin K, Adnan A. Effects of Focal Axonal Swelling Level on the  
887 Action Potential Signal Transmission. *J Comput Neurosci.* 2020;48.  
888 doi:10.1007/s10827-020-00750-9
- 889 68. Nazari-Vanani R, Mohammadpour R, Asadian E, Rafii-Tabar H, Sasanpour P. A  
890 computational modelling study of excitation of neuronal cells with triboelectric

- 891 nanogenerators. *Sci Rep.* 2022;12: 1–10. doi:10.1038/s41598-022-17050-0
- 892 69. Bazarevsky V, Zhang F. On-Device, Real-Time Hand Tracking with MediaPipe.  
893 In: Google AI Blog. 2019.
- 894 70. Pistoia W, Van Rietbergen B, Lochmüller EM, Lill CA, Eckstein F, Rügsegger  
895 P. Estimation of distal radius failure load with micro-finite element analysis  
896 models based on three-dimensional peripheral quantitative computed tomography  
897 images. *Bone.* 2002;30. doi:10.1016/S8756-3282(02)00736-6
- 898 71. Ma Z, Hu S, Tan JS, Myer C, Njus NM, Xia Z. In vitro and in vivo mechanical  
899 properties of human ulnar and median nerves. *J Biomed Mater Res - Part A.*  
900 2013;101 A. doi:10.1002/jbm.a.34573
- 901 72. Armstrong J, Chaffins DONB. Some Biomechanical Aspects of the carpal tunnel.  
902 *Biomechanics.* 1979;12: 567–570.
- 903 73. Tan SR, Mathis LM, El-Gamal HM. Surgical Pearl: Safe splinting positions for  
904 skin grafts on the hand and wrist. *J Am Acad Dermatol.* 2005;52.  
905 doi:10.1016/j.jaad.2004.10.866
- 906 74. Taams KO, Ash GJ, Johannes S. Maintaining the safe position in a palmar splint:  
907 The “double-T” plaster splint. *J Hand Surg (British Eur Vol.* 1996;21.  
908 doi:10.1016/S0266-7681(05)80214-1
- 909 75. Clark DC. Common Acute Hand Infections. *American Family Physician.* 2003.
- 910 76. Lee KS, Jung MC. Flexion and extension angles of resting fingers and wrist. *Int J*  
911 *Occup Saf Ergon.* 2014;20. doi:10.1080/10803548.2014.11077038
- 912 77. Lee JW, Rim K. Measurement of finger joint angles and maximum finger forces  
913 during cylinder grip activity. *J Biomed Eng.* 1991;13: 152–162.  
914 doi:10.1016/0141-5425(91)90062-C
- 915 78. Li ZM, Jordan DB. Carpal tunnel mechanics and its relevance to carpal tunnel  
916 syndrome. *Hum Mov Sci.* 2023;87. doi:10.1016/j.humov.2022.103044
- 917 79. Aletto C, Aicale R, Oliva F, Maffulli N. Hand Flexor Tendon Repair: From  
918 Biology to Surgery and Rehabilitation. *Hand Clin.* 2023;39: 215–225.  
919 doi:10.1016/j.hcl.2022.12.001
- 920 80. Toge Y, Nishimura Y, Basford JR, Nogawa T, Yamanaka M, Nakamura T, et al.  
921 Comparison of the effects of flexion and extension of the thumb and fingers on  
922 the position and cross-sectional area of the median nerve. *PLoS One.* 2013;8.  
923 doi:10.1371/journal.pone.0083565
- 924 81. Murthy PG, Bae DS. Injuries to the Wrist, Hand, and Fingers. 2018.  
925 doi:10.1007/978-3-319-56188-2\_10
- 926 82. Portenard AC, Pegot A, Lievain L, Michelin P, Angot É, Beccari R, et al. The

- 927 distal dorsal intermetacarpal ligament: characterization of an overlooked  
928 structure—an anatomical study of 25 hands. *Surg Radiol Anat.* 2023;45: 673–  
929 679. doi:10.1007/s00276-023-03139-2
- 930 83. Gardenier J, Garg R, Mudgal C. Upper extremity tendon transfers: A brief review  
931 of history, common applications, and technical tips. *Indian Journal of Plastic  
932 Surgery.* 2020. doi:10.1055/s-0040-1716456
- 933 84. Abdelhafiz MH, Andreasen Struijk LNS, Dosen S, Spaich EG. Biomimetic  
934 Tendon-Based Mechanism for Finger Flexion and Extension in a Soft Hand  
935 Exoskeleton: Design and Experimental Assessment. *Sensors.* 2023;23.  
936 doi:10.3390/s23042272
- 937 85. Kim J, Rhee SH, Gong HS, Oh S, Baek GH. Biomechanical analyses of the  
938 human flexor tendon adhesion models in the hand: A cadaveric study. *J Orthop  
939 Res.* 2015;33. doi:10.1002/jor.22798
- 940 86. Mackey AL, Heinemeier KM, Koskinen SOA, Kjaer M. Dynamic adaptation of  
941 tendon and muscle connective tissue to mechanical loading. *Connect Tissue Res.*  
942 2008;49. doi:10.1080/03008200802151672
- 943 87. Turrina A, Martínez-González MA, Stecco C. The muscular force transmission  
944 system: Role of the intramuscular connective tissue. *J Bodyw Mov Ther.*  
945 2013;17. doi:10.1016/j.jbmt.2012.06.001
- 946 88. Ettema AM, Zhao C, Amadio PC, O’Byrne MM, An KN. Gliding characteristics  
947 of flexor tendon and tenosynovium in carpal tunnel syndrome: A pilot study. *Clin  
948 Anat.* 2007;20. doi:10.1002/ca.20379
- 949 89. Farias Zuniga A, Keir PJ. Thirty Minutes of Sub-diastolic Blood Flow Occlusion  
950 Alters Carpal Tunnel Tissue Function and Mechanics. *Ultrasound Med Biol.*  
951 2022;48. doi:10.1016/j.ultrasmedbio.2022.02.008
- 952 90. Waugh CM, Mousavizadeh R, Lee J, Screen HRC, Scott A. Mild  
953 hypercholesterolemia impacts achilles sub-tendon mechanical properties in  
954 young rats. *BMC Musculoskelet Disord.* 2023;24: 282. doi:10.1186/s12891-023-  
955 06375-0
- 956 91. Bauman TD, Gelberman RH, Mubarak SJ, Garfin SR. The acute carpal tunnel  
957 syndrome. *Clin Orthop Relat Res.* 1981;156: 151–156. doi:10.1097/00003086-  
958 198105000-00019
- 959 92. Lundborg G, Myers R, Powell H. Nerve compression injury and increased  
960 endoneurial fluid pressure: A “miniature compartment syndrome”; *J  
961 Neurol Neurosurg Psychiatry.* 1983;46. doi:10.1136/jnnp.46.12.1119
- 962 93. Luchetti R, Schoenhuber R, Alfarano M, Deluca S, De Cicco G, Landi A. Carpal  
963 tunnel syndrome: Correlations between pressure measurement and intraoperative  
964 electrophysiological nerve study. *Muscle Nerve.* 1990;13.  
965 doi:10.1002/mus.880131211

- 966 94. Min J, Choi T, Cha Y. Multiple Tendon-inspired Sensors for Hand Motion  
967 Detection. *Smart Mater Struct.* 2023;32. doi:10.1088/1361-665X/acafb9
- 968 95. Kursá K, Lattanza L, Diao E, Rempel D. In vivo flexor tendon forces increase  
969 with finger and wrist flexion during active finger flexion and extension. *J Orthop*  
970 *Res.* 2006;24. doi:10.1002/jor.20110
- 971 96. Szabo RM, Chidgey LK. Stress carpal tunnel pressures in patients with carpal  
972 tunnel syndrome and normal patients. *J Hand Surg Am.* 1989;14.  
973 doi:10.1016/0363-5023(89)90178-0
- 974 97. Werner CO, Elmqvist D, Ohlin P. Pressure and nerve lesion in the carpal tunnel.  
975 *Acta Orthop.* 1983;54. doi:10.3109/17453678308996576
- 976 98. Rojviroj S, Sirichativapee W, Kowsuwon W, Wongwiwattananon J,  
977 Tamnanthong N, Jeeravipoolvarn P. Pressures in the carpal tunnel. A comparison  
978 between patients with carpal tunnel syndrome and normal subjects. *J Bone Jt*  
979 *Surg - Ser B.* 1990;72. doi:10.1302/0301-620x.72b3.2187880
- 980 99. Hamanaka I, Okutsu I, Shimizu K, Takatori Y, Ninomiya S. Evaluation of carpal  
981 canal pressure in carpal tunnel syndrome. *J Hand Surg Am.* 1995;20.  
982 doi:10.1016/S0363-5023(05)80442-3
- 983 100. Goss BC, Agee JM. Dynamics of Intracarpal Tunnel Pressure in Patients With  
984 Carpal Tunnel Syndrome. *J Hand Surg Am.* 2010;35.  
985 doi:10.1016/j.jhsa.2009.09.019
- 986 101. Kanta M, Ehler E, Kremláček J, Reháček S, Lastovická D, Adamkov J, et al. The  
987 potential benefit of intracarpal pressure measurement in endoscopic carpal tunnel  
988 syndrome surgery--an analysis of EMG findings and pressure values. *Acta*  
989 *Medica (Hradec Kralove).* 2009;52. doi:10.14712/18059694.2016.106
- 990 102. Uchiyama S, Yasutomi T, Momose T, Nakagawa H, Kamimura M, Kato H.  
991 Carpal tunnel pressure measurement during two-portal endoscopic carpal tunnel  
992 release. *Clin Biomech.* 2010;25. doi:10.1016/j.clinbiomech.2010.06.019
- 993



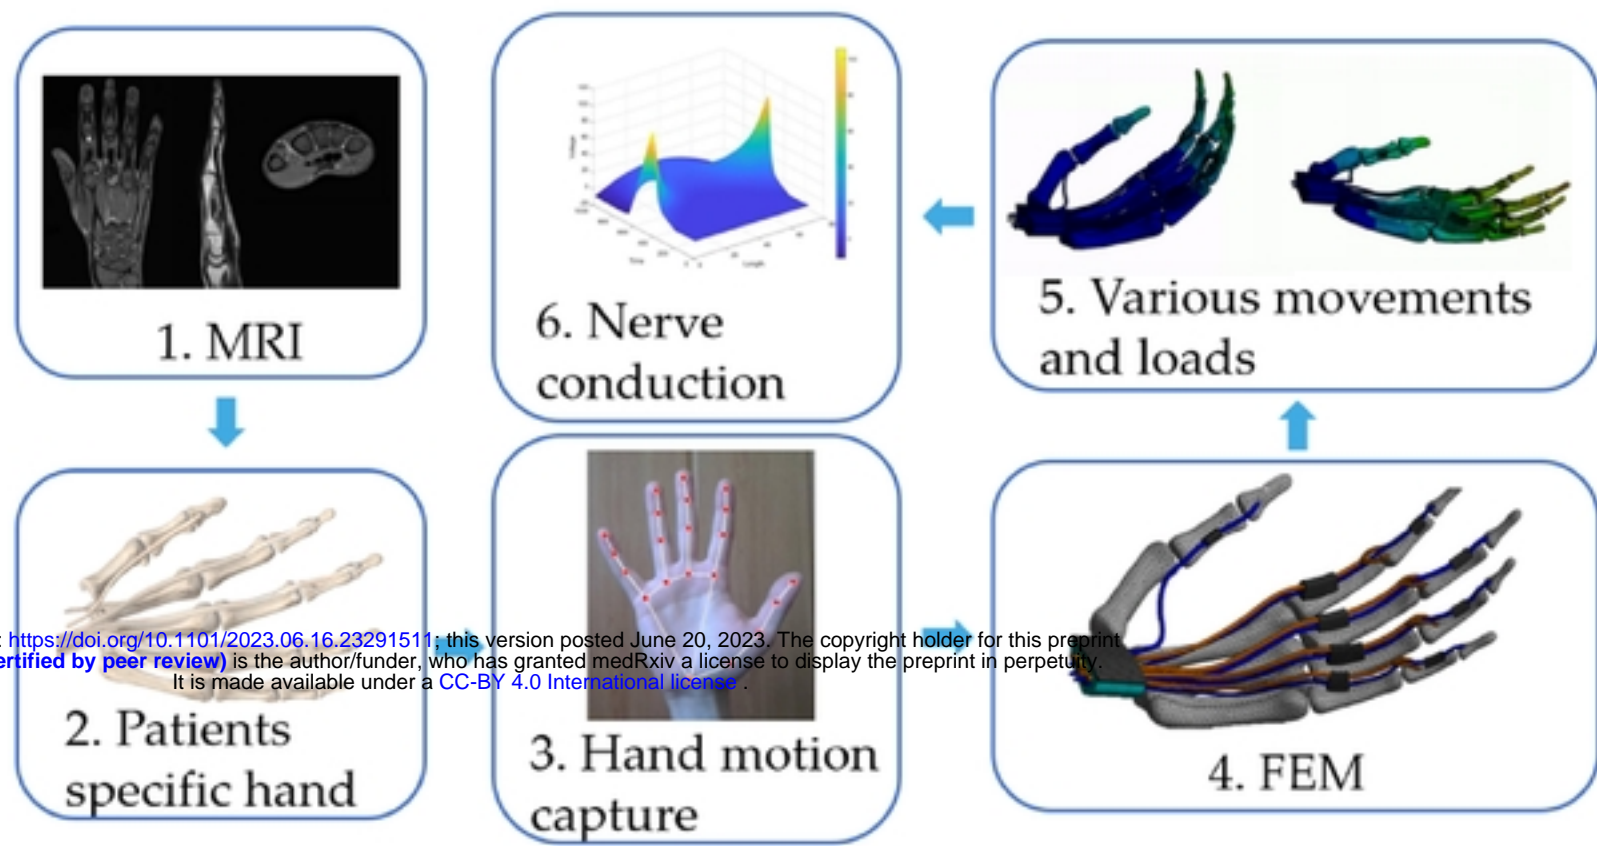

medRxiv preprint doi: <https://doi.org/10.1101/2023.06.16.23291511>; this version posted June 20, 2023. The copyright holder for this preprint (which was not certified by peer review) is the author/funder, who has granted medRxiv a license to display the preprint in perpetuity. It is made available under a [CC-BY 4.0 International license](https://creativecommons.org/licenses/by/4.0/).

**Fig 1.** A six-stage approach for the early diagnosis of carpal tunnel syndrome.

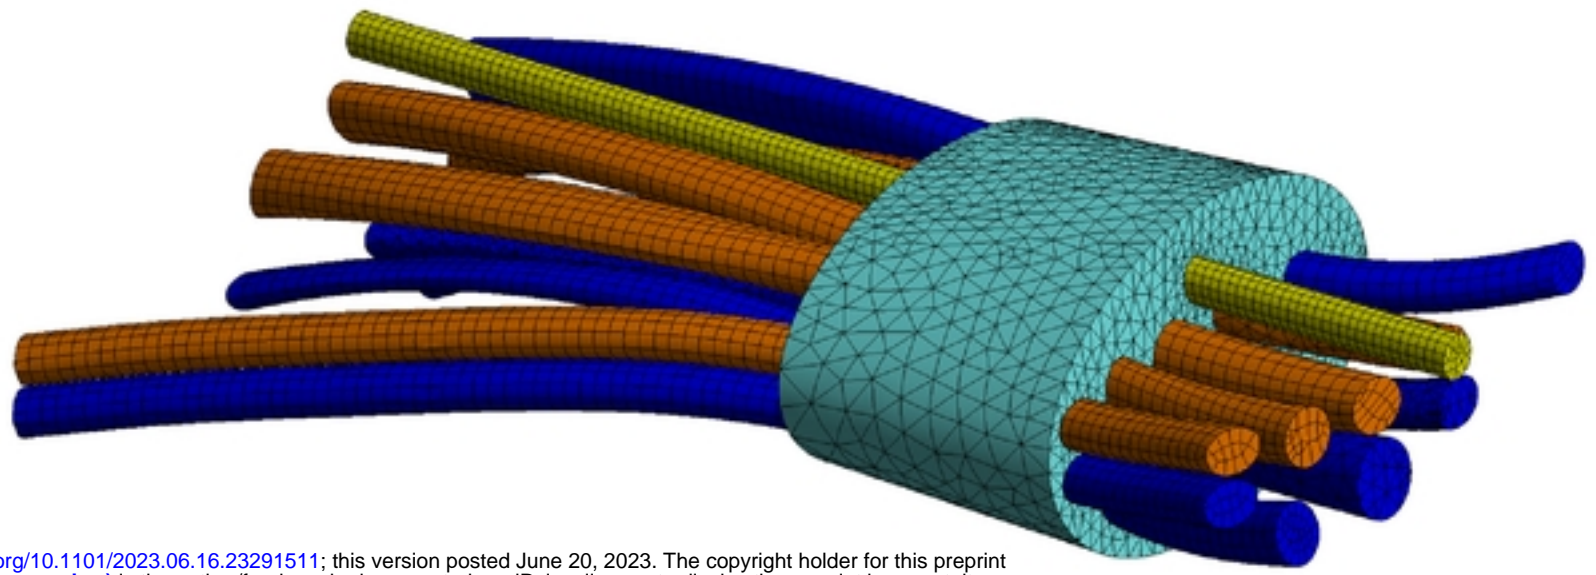

medRxiv preprint doi: <https://doi.org/10.1101/2023.06.16.23291511>; this version posted June 20, 2023. The copyright holder for this preprint (which was not certified by peer review) is the author/funder, who has granted medRxiv a license to display the preprint in perpetuity. It is made available under a [CC-BY 4.0 International license](https://creativecommons.org/licenses/by/4.0/).

a

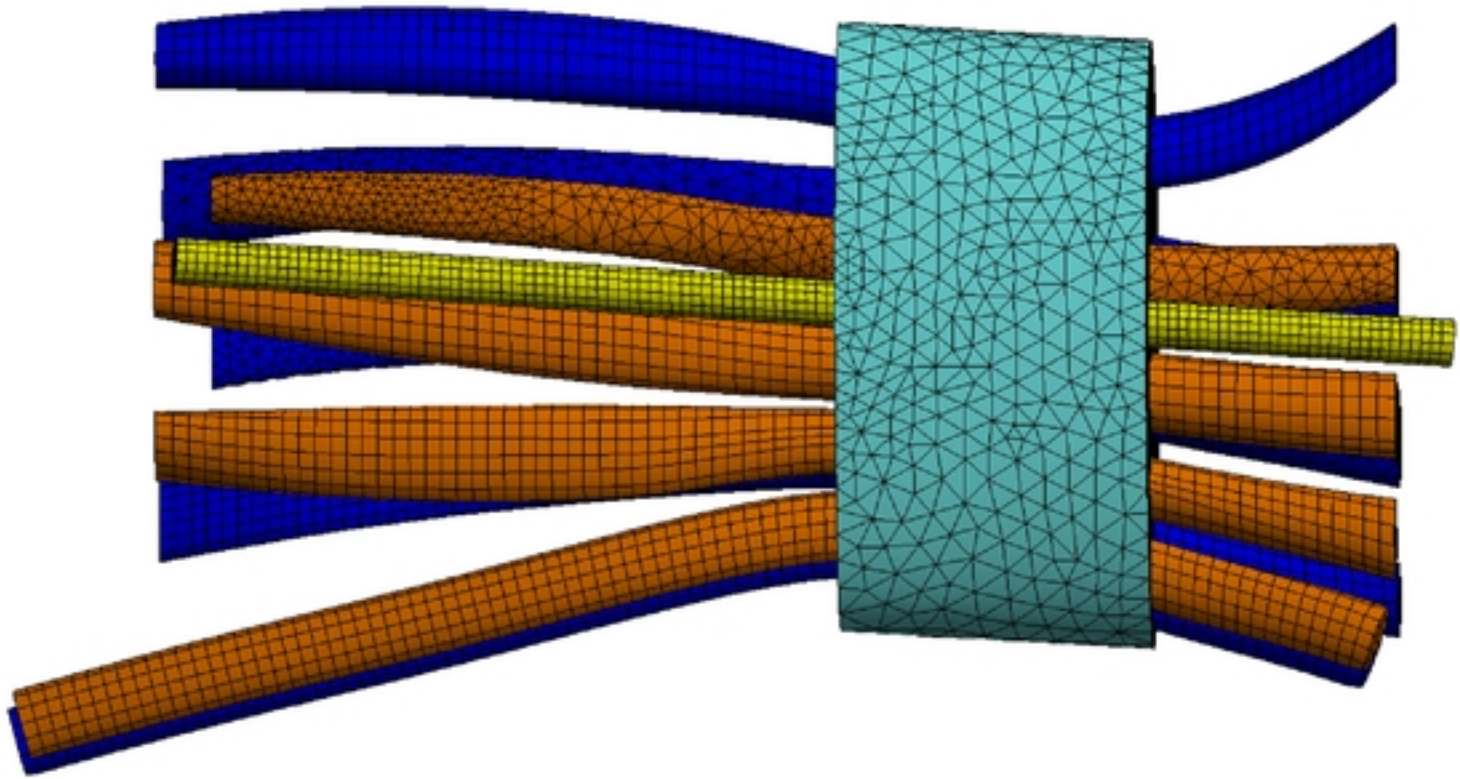

b

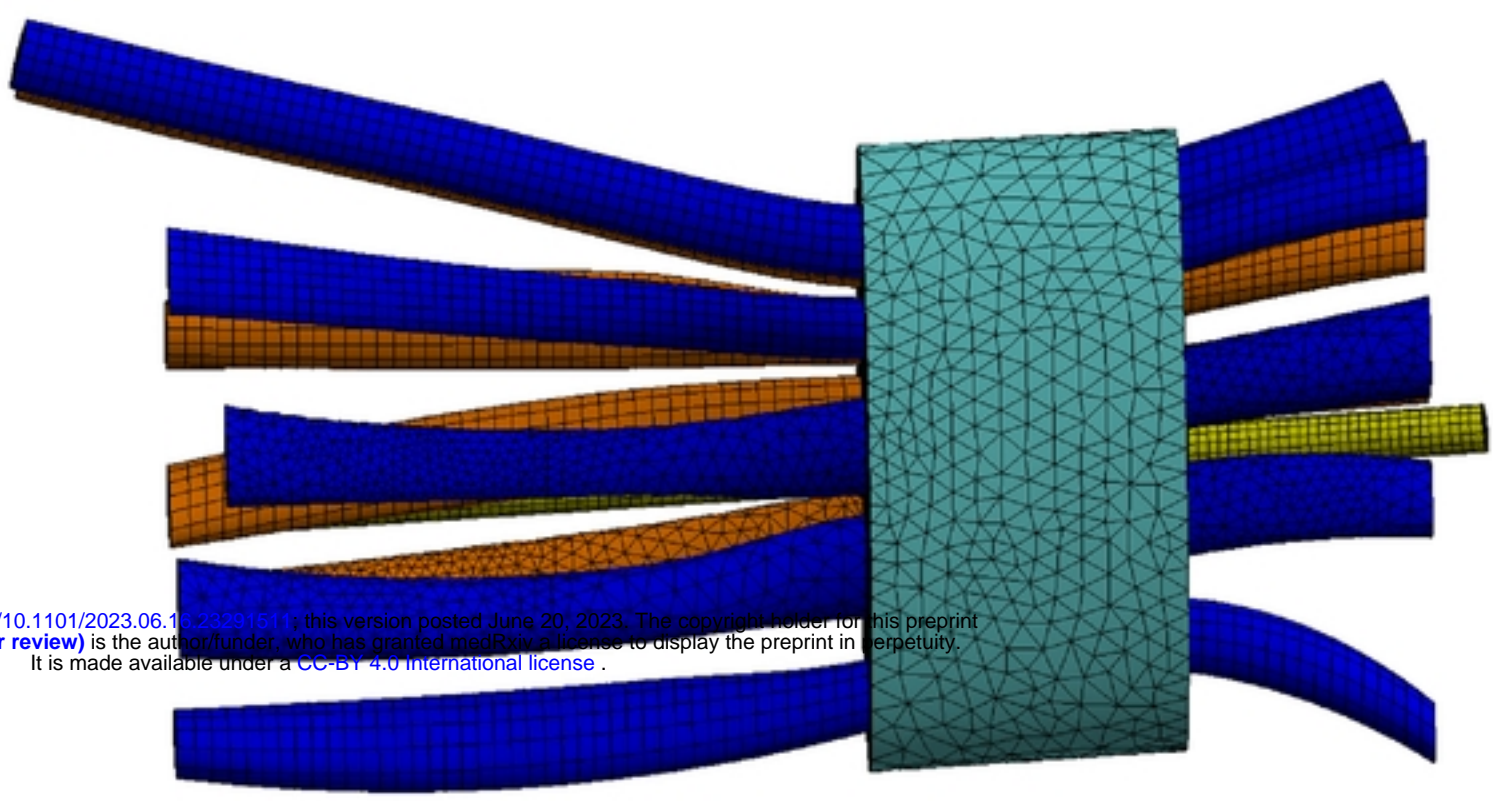

medRxiv preprint doi: <https://doi.org/10.1101/2023.06.16.23291511>; this version posted June 20, 2023. The copyright holder for this preprint (which was not certified by peer review) is the author/funder, who has granted medRxiv a license to display the preprint in perpetuity. It is made available under a [CC-BY 4.0 International license](https://creativecommons.org/licenses/by/4.0/).

c

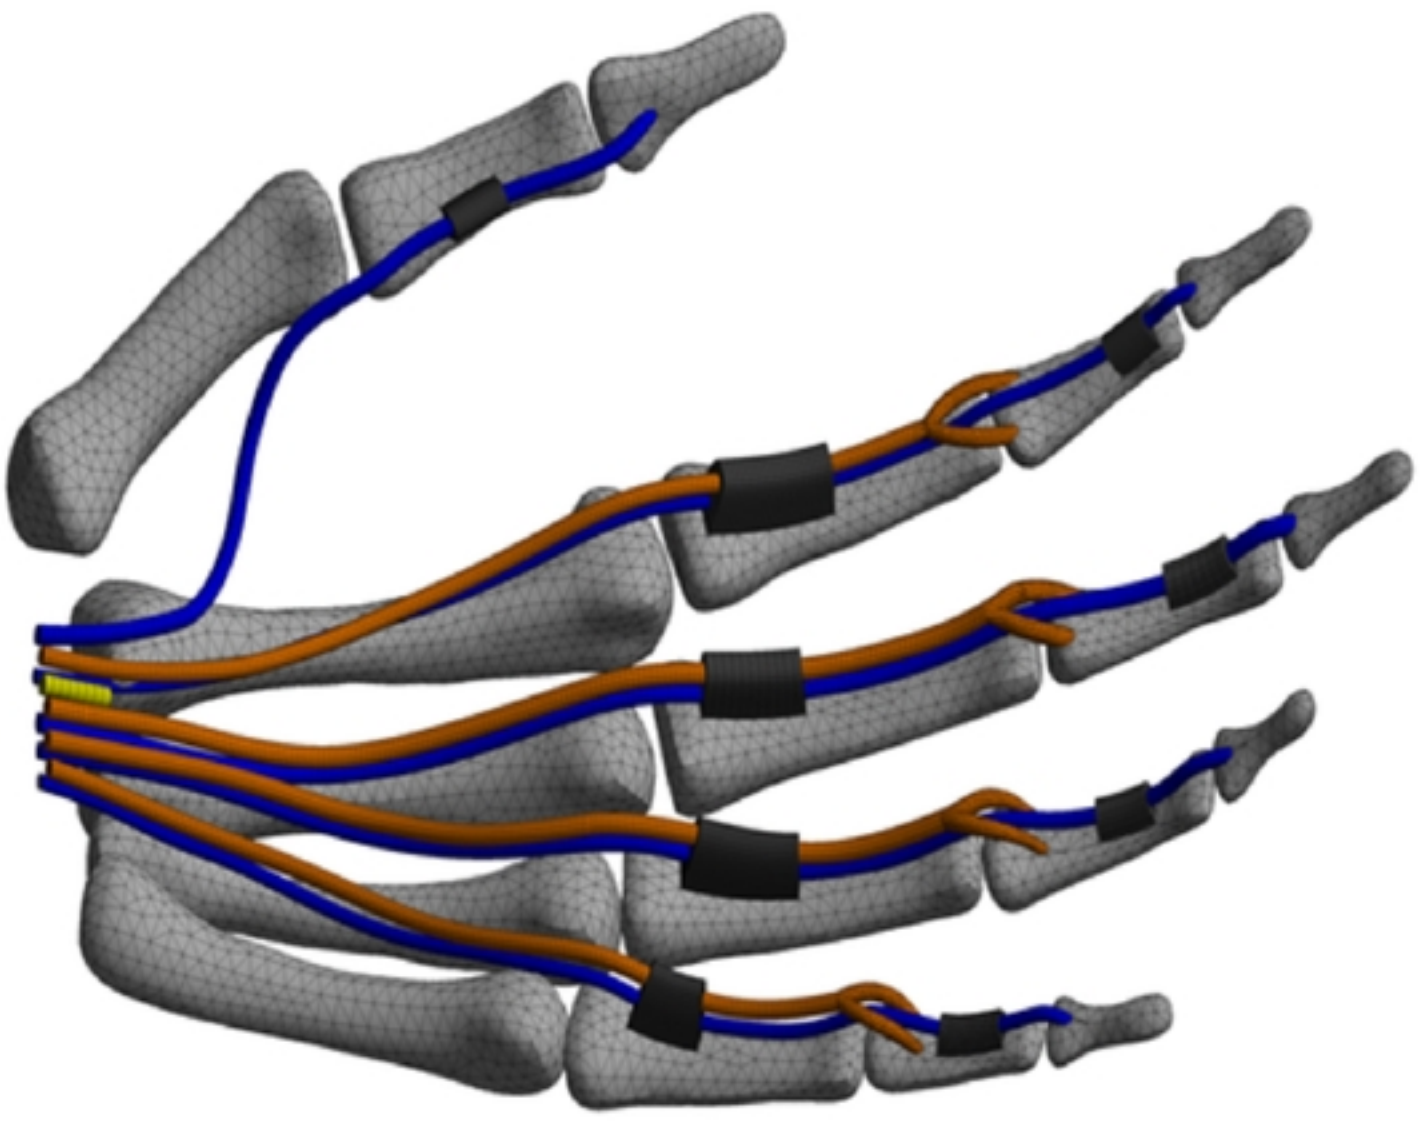

d

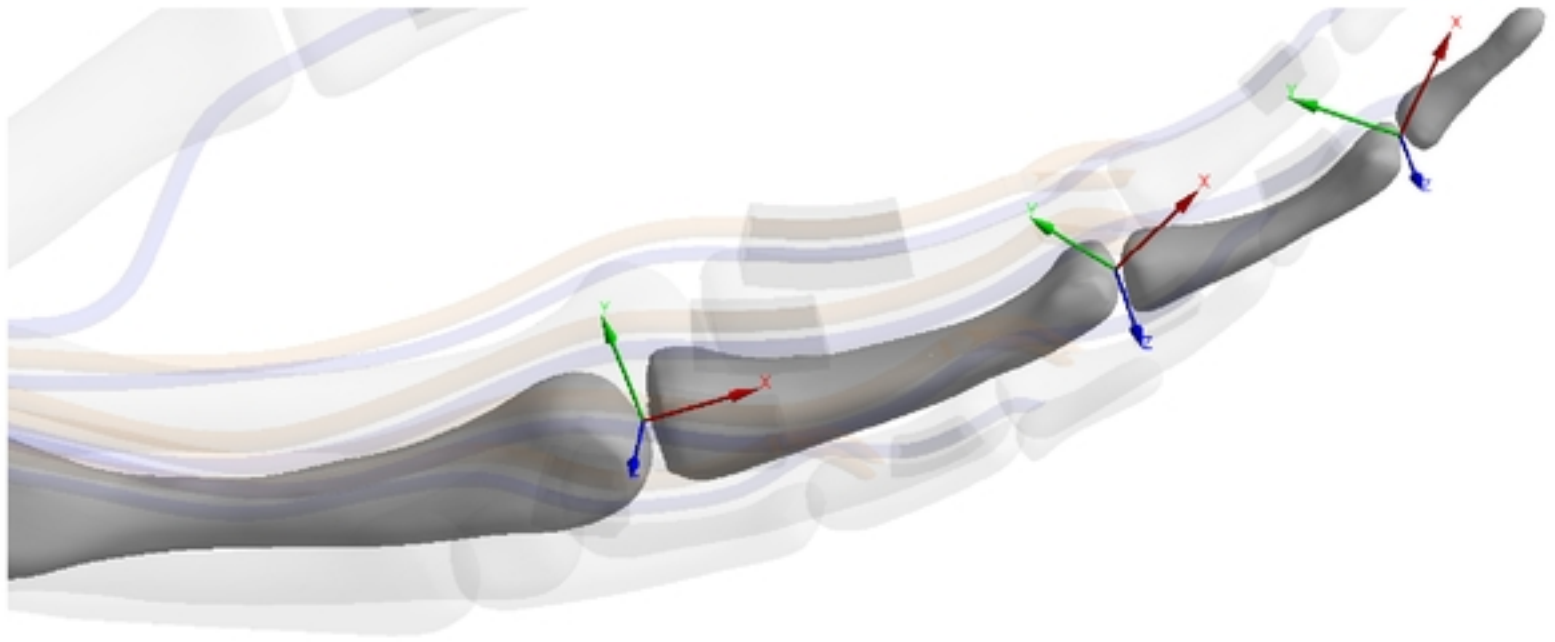

medRxiv preprint doi: <https://doi.org/10.1101/2023.06.16.23291511>; this version posted June 20, 2023. The copyright holder for this preprint (which was not certified by peer review) is the author/funder, who has granted medRxiv a license to display the preprint in perpetuity. It is made available under a [CC-BY 4.0 International license](https://creativecommons.org/licenses/by/4.0/).

e

**Fig 2.** Patient-specific finite element model of carpal tunnel (a) – general view, (b) – top view, (c) – bot view and. (d) – Finite element model of a hand (carpal tunnel is hidden), (e) – The connection of the phalanges with the joint and the coordinate system of the joint.

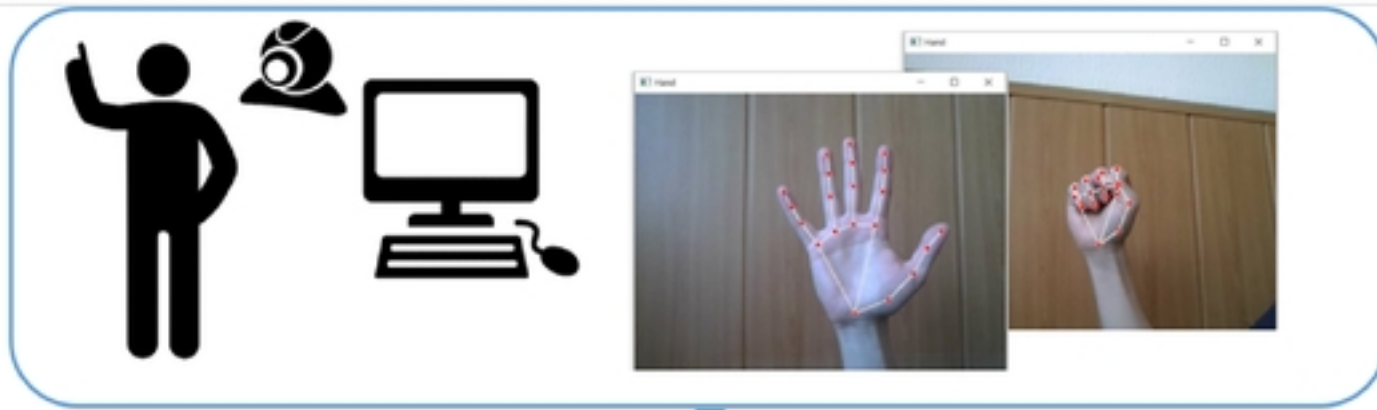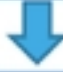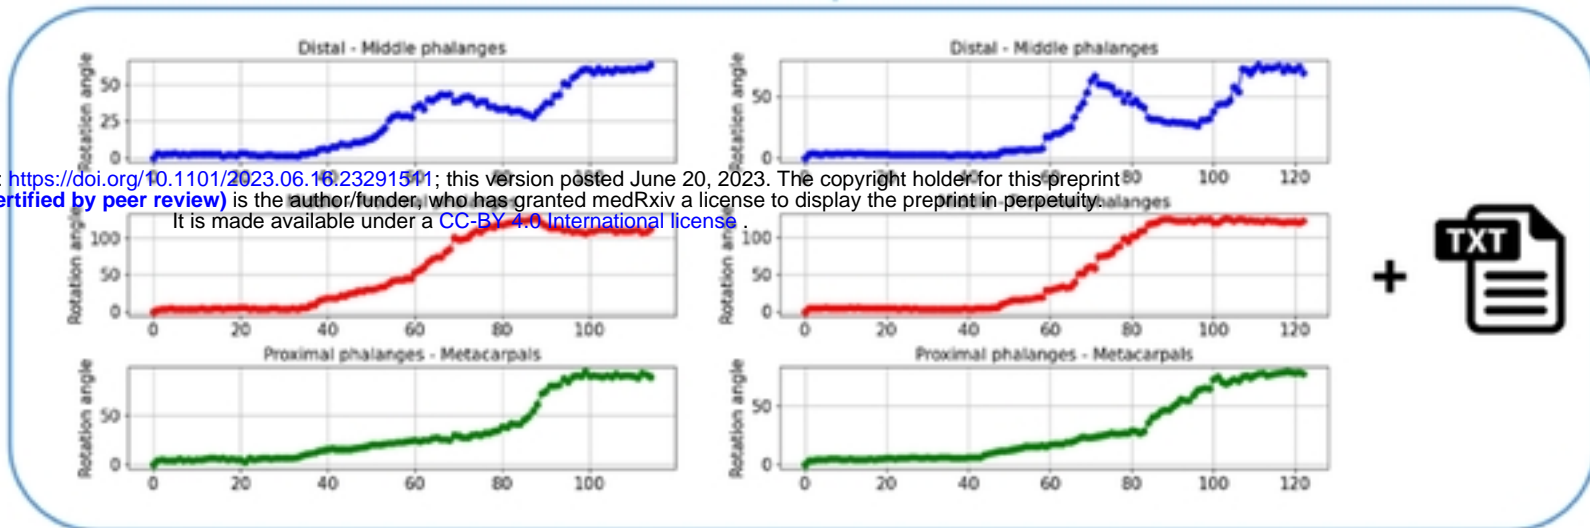

medRxiv preprint doi: <https://doi.org/10.1101/2023.06.16.23291511>; this version posted June 20, 2023. The copyright holder for this preprint (which was not certified by peer review) is the author/funder, who has granted medRxiv a license to display the preprint in perpetuity. It is made available under a [CC-BY 4.0 International license](https://creativecommons.org/licenses/by/4.0/).

**Fig 3. Motion capture process**

medRxiv preprint doi: <https://doi.org/10.1101/2023.06.16.23291511>; this version posted June 20, 2023. The copyright holder for this preprint (which was not certified by peer review) is the author/funder, who has granted medRxiv a license to display the preprint in perpetuity. It is made available under a [CC-BY 4.0 International license](https://creativecommons.org/licenses/by/4.0/).

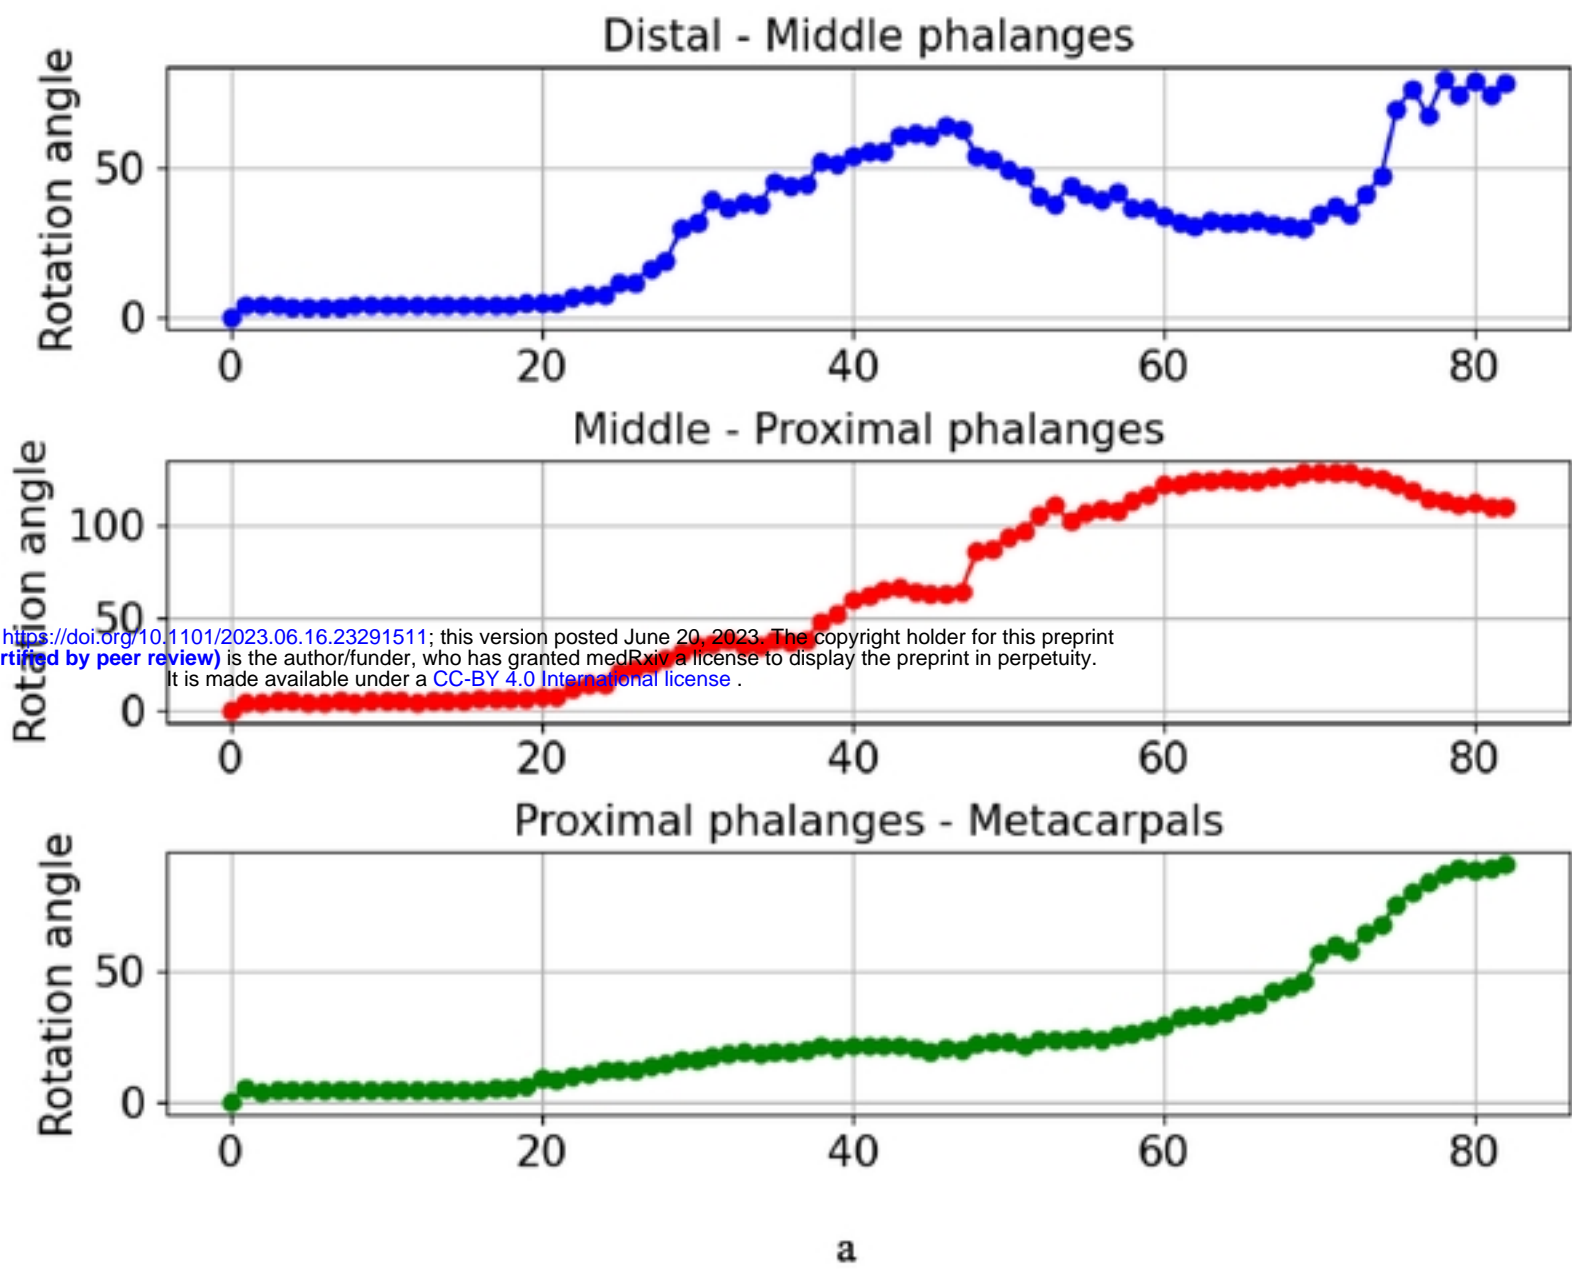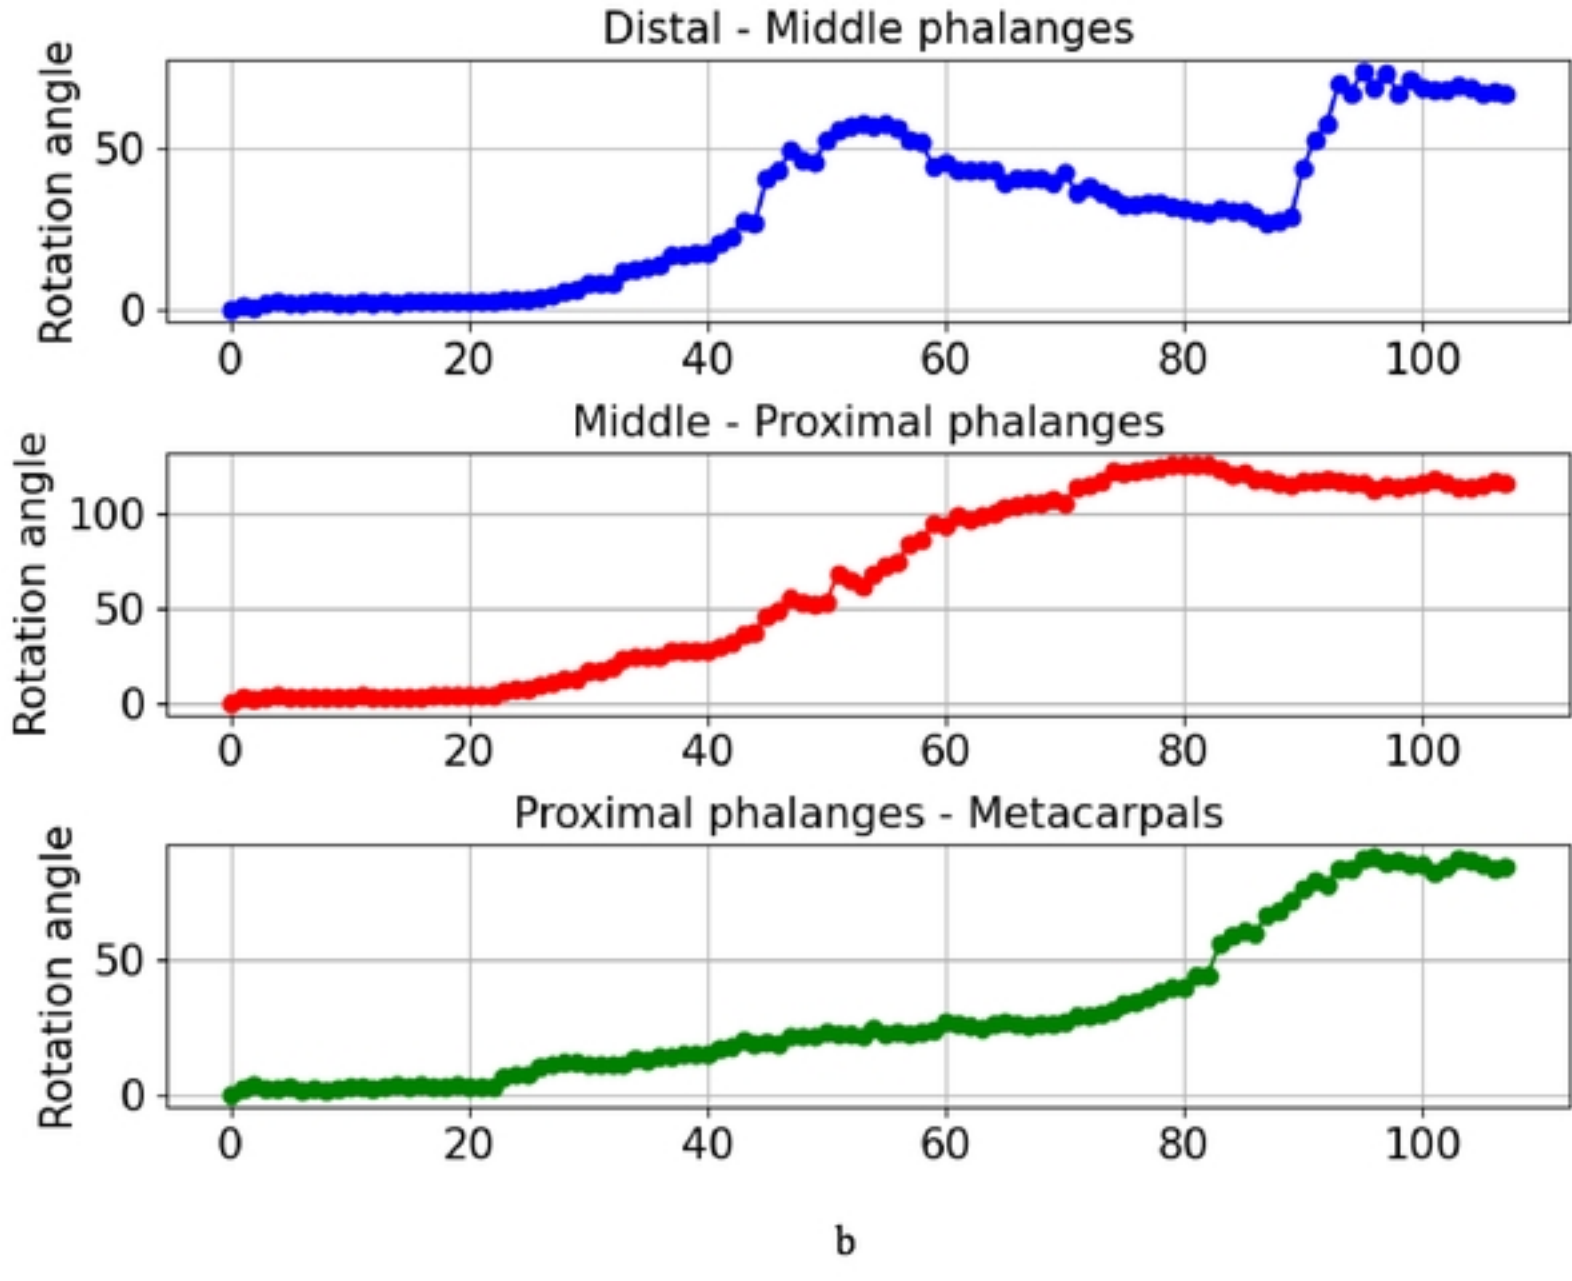

medRxiv preprint doi: <https://doi.org/10.1101/2023.06.16.23291511>; this version posted June 20, 2023. The copyright holder for this preprint (which was not certified by peer review) is the author/funder, who has granted medRxiv a license to display the preprint in perpetuity. It is made available under a [CC-BY 4.0 International license](https://creativecommons.org/licenses/by/4.0/).

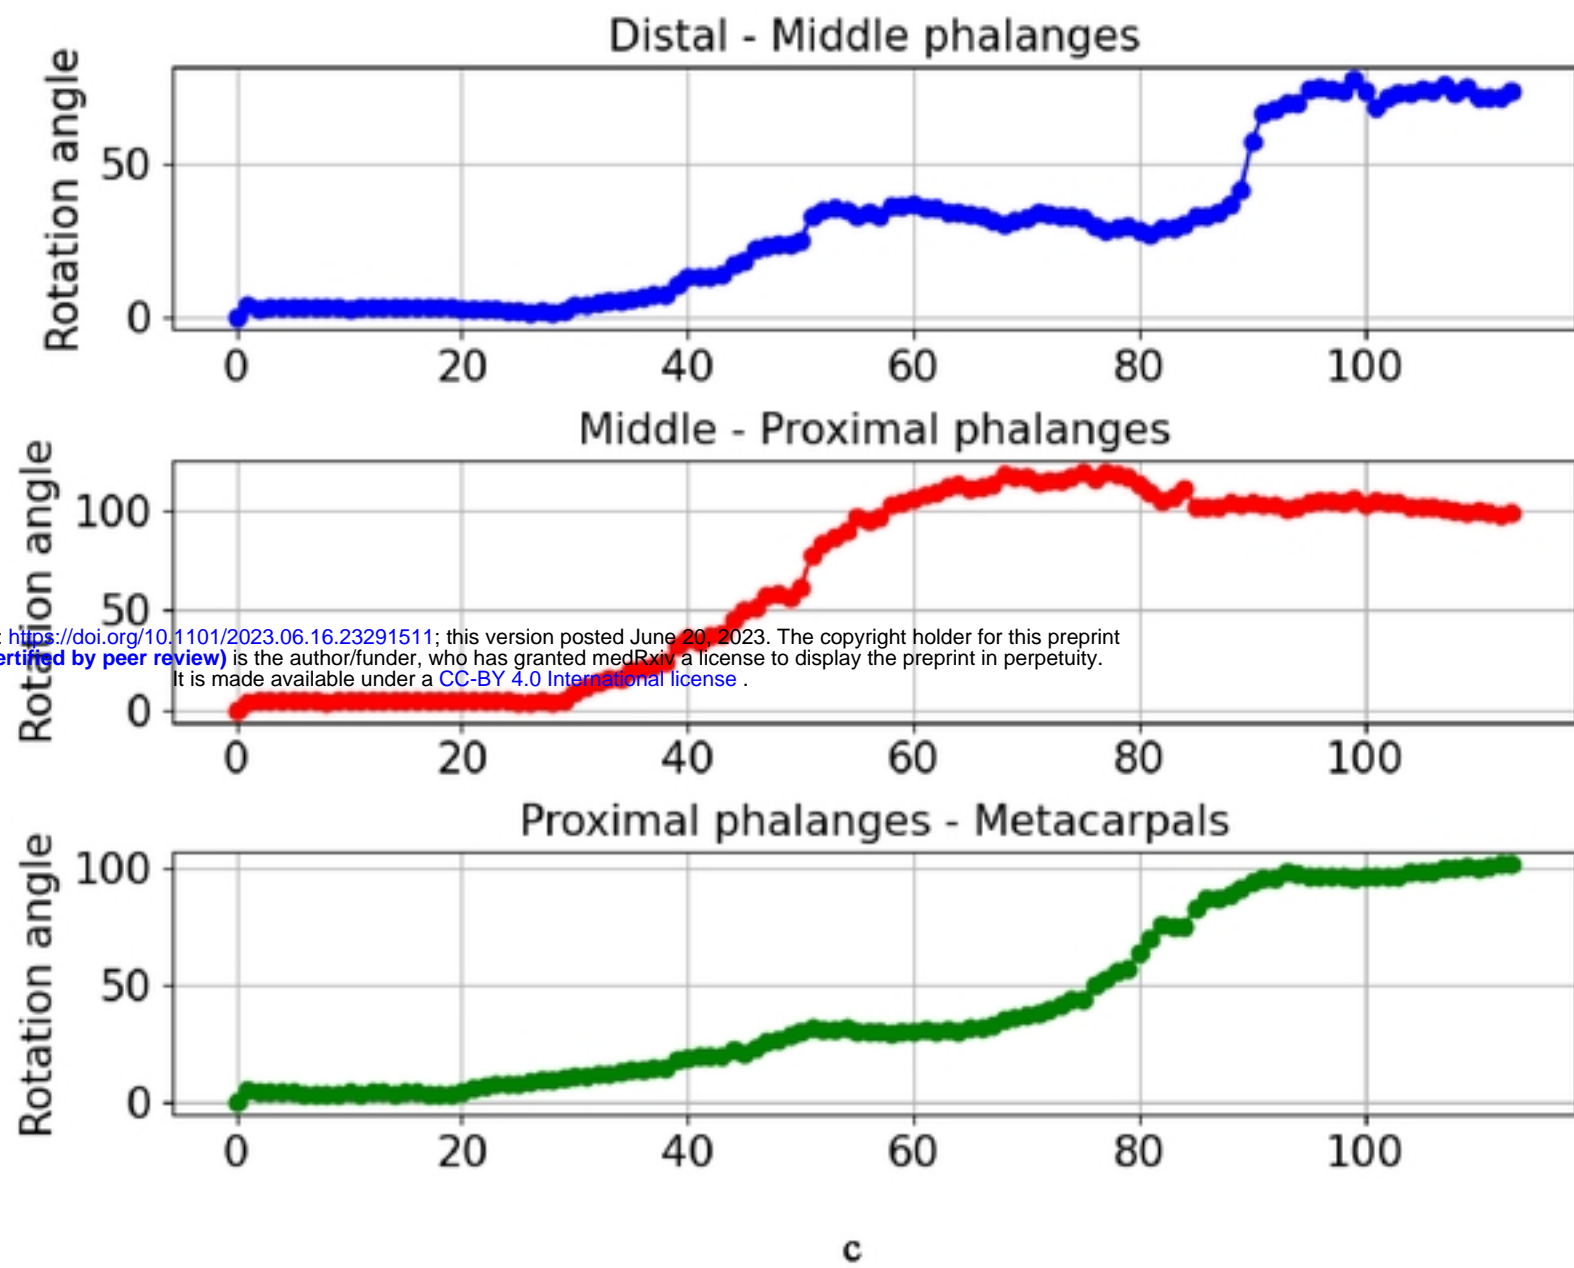

c

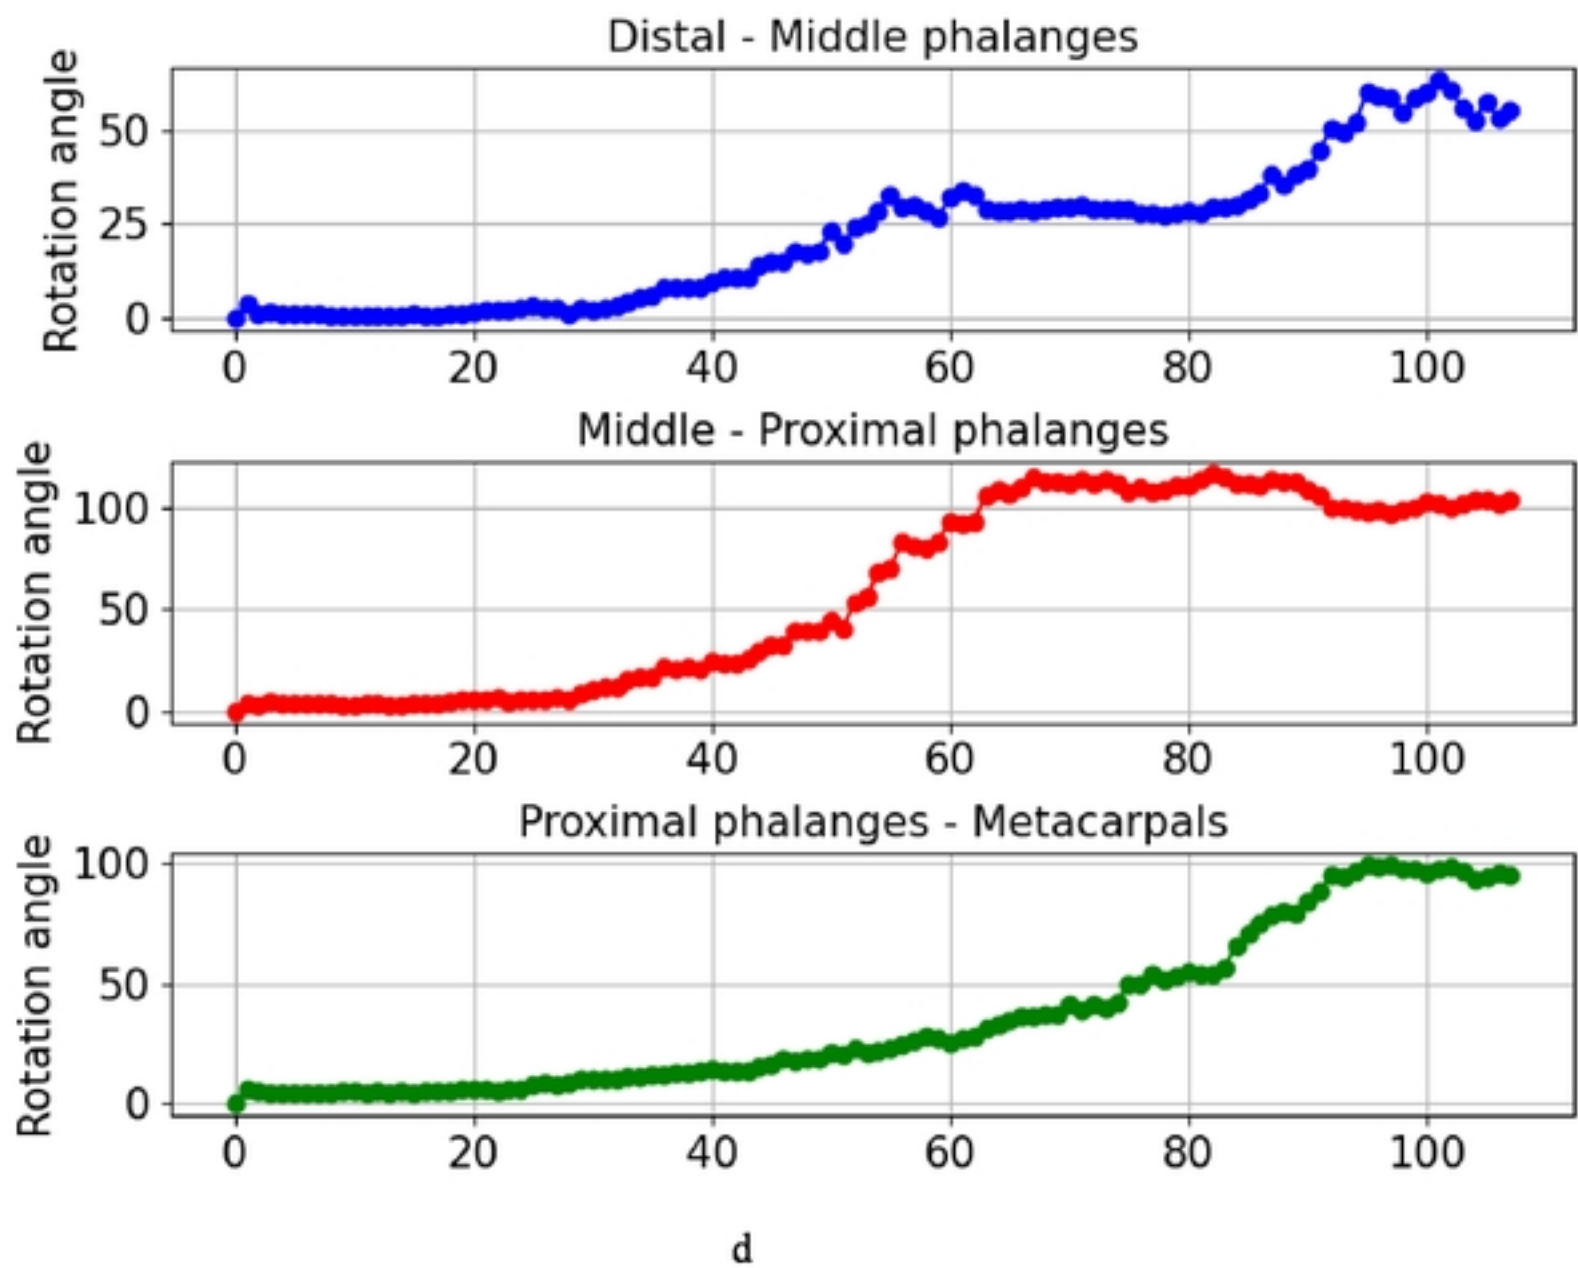

d

medRxiv preprint doi: <https://doi.org/10.1101/2023.06.16.23291511>; this version posted June 20, 2023. The copyright holder for this preprint (which was not certified by peer review) is the author/funder, who has granted medRxiv a license to display the preprint in perpetuity. It is made available under a [CC-BY 4.0 International license](https://creativecommons.org/licenses/by/4.0/).

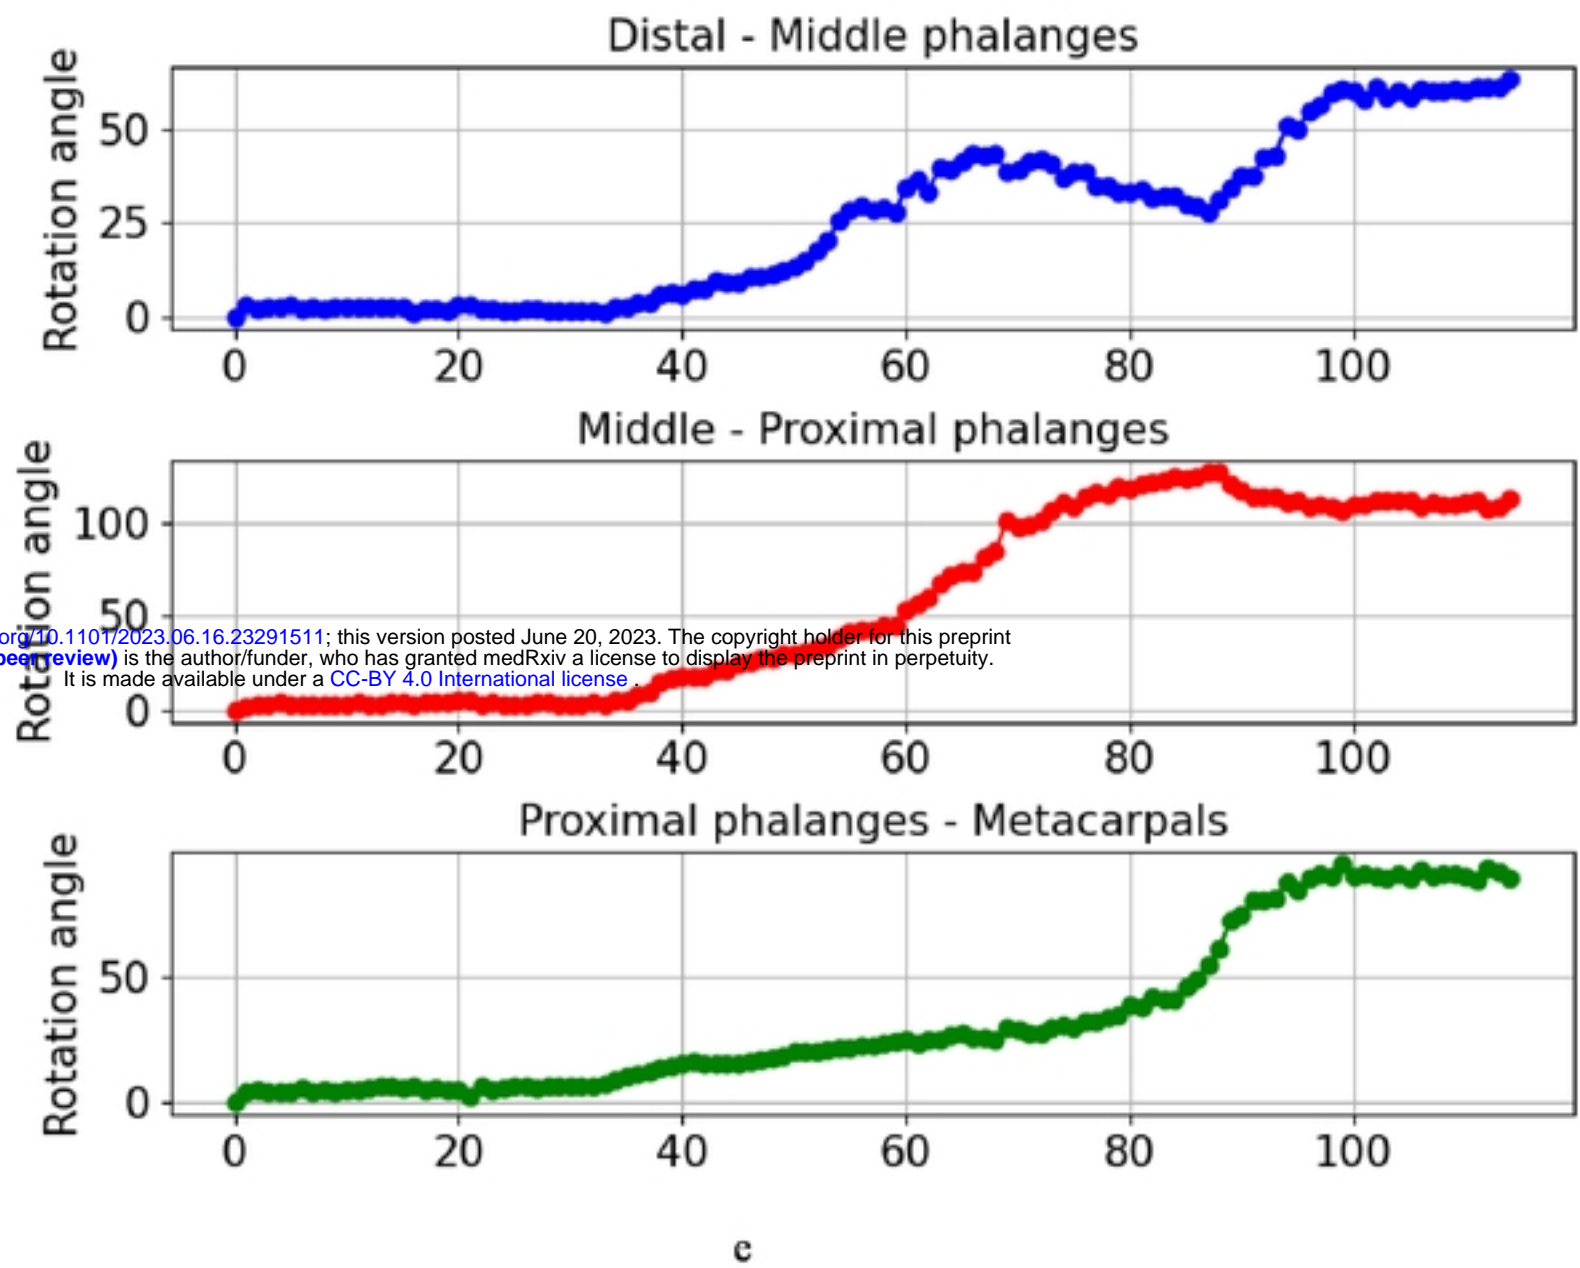

**Fig 4.** Change of angles in the three joints of the index finger over time obtained by motion capture: a-e series number from one to six.



Type: Total Deformation  
Unit: mm  
Time: 3

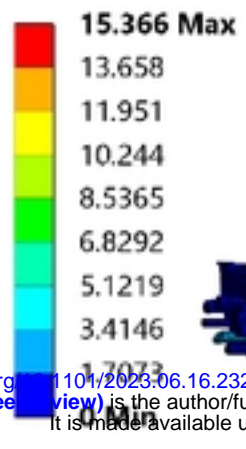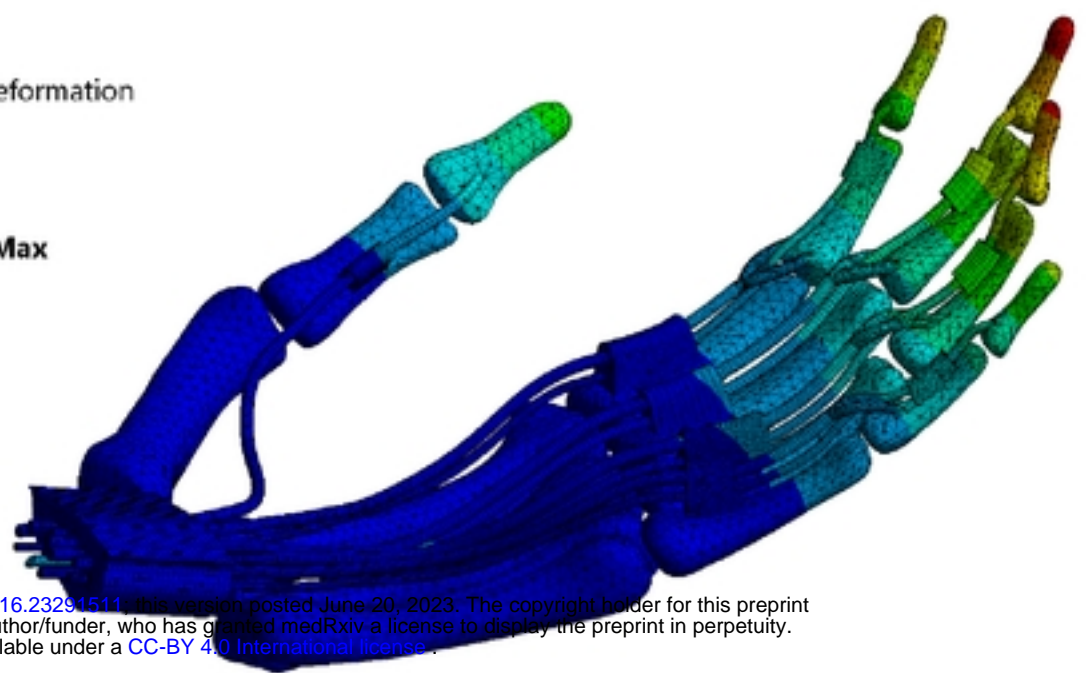

a

Type: Total Deformation  
Unit: mm  
Time: 15

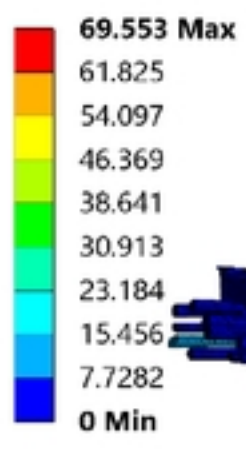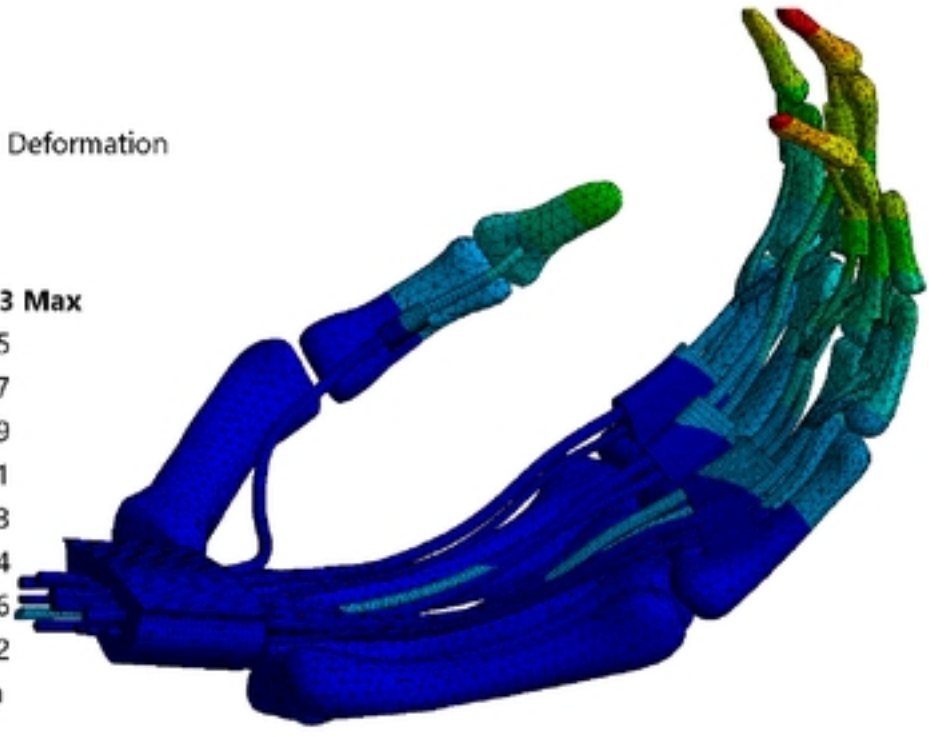

b

medRxiv preprint doi: <https://doi.org/10.1101/2023.06.16.23291511>; this version posted June 20, 2023. The copyright holder for this preprint (which was not certified by peer review) is the author/funder, who has granted medRxiv a license to display the preprint in perpetuity. It is made available under a [CC-BY 4.0 International license](https://creativecommons.org/licenses/by/4.0/).

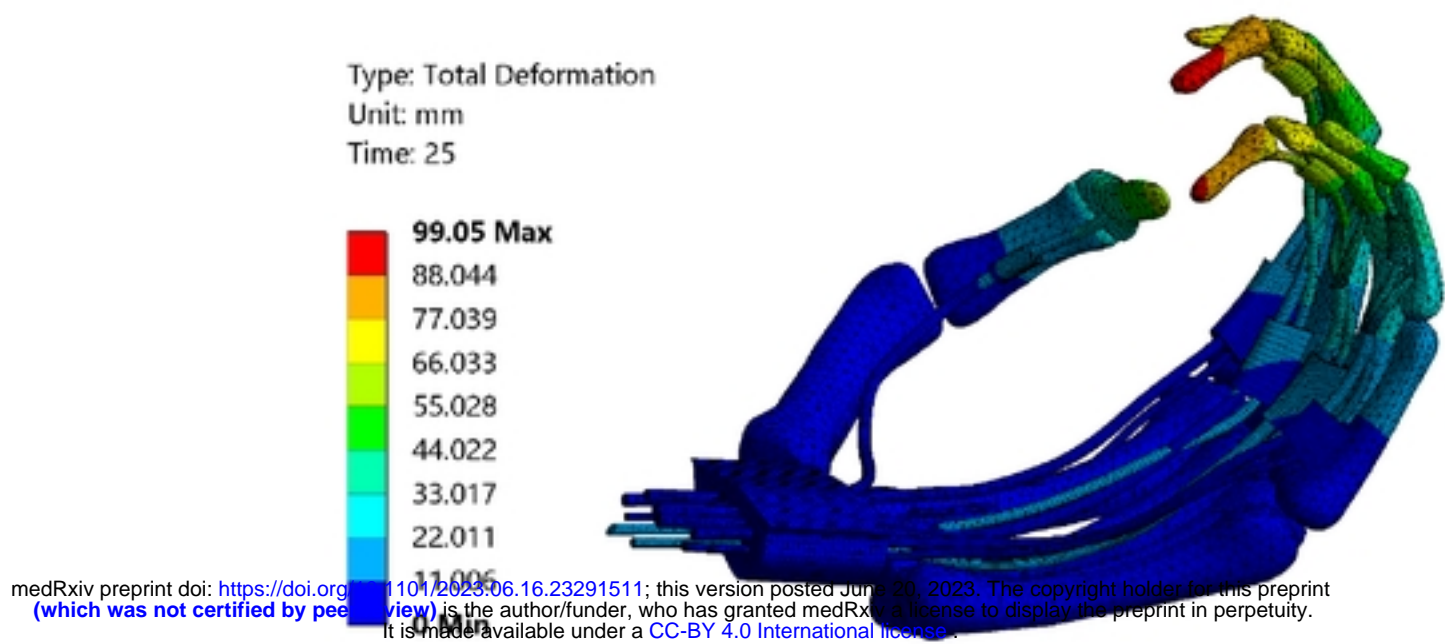

c

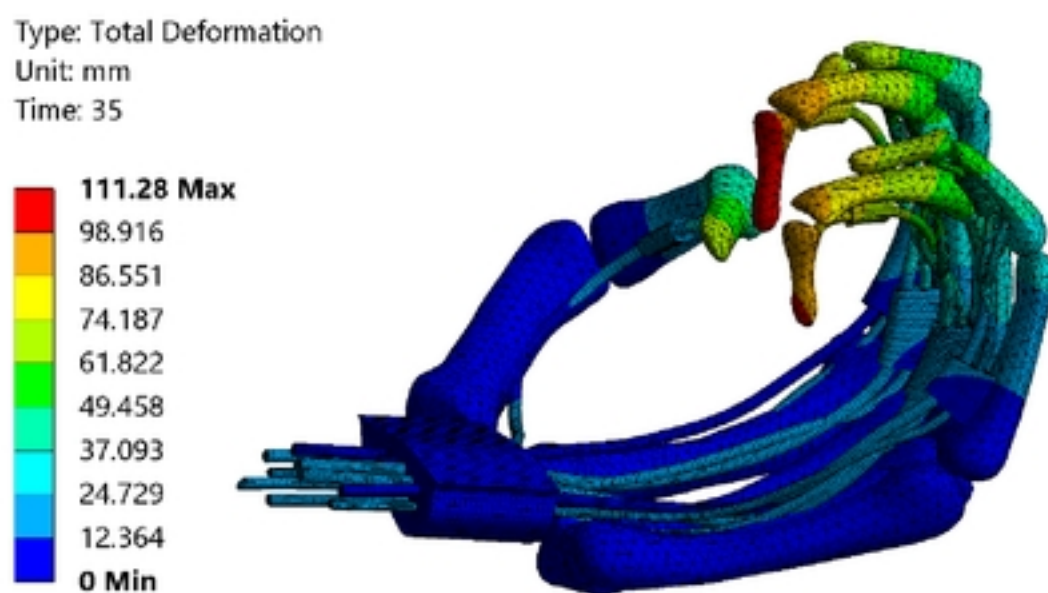

d

**Fig 5.** Total deformation during finger flexion: (a)  $t = 3s$ , (b)  $t=15s$ , (c),  $t= 25s$ , (d)  $t=35s$ .

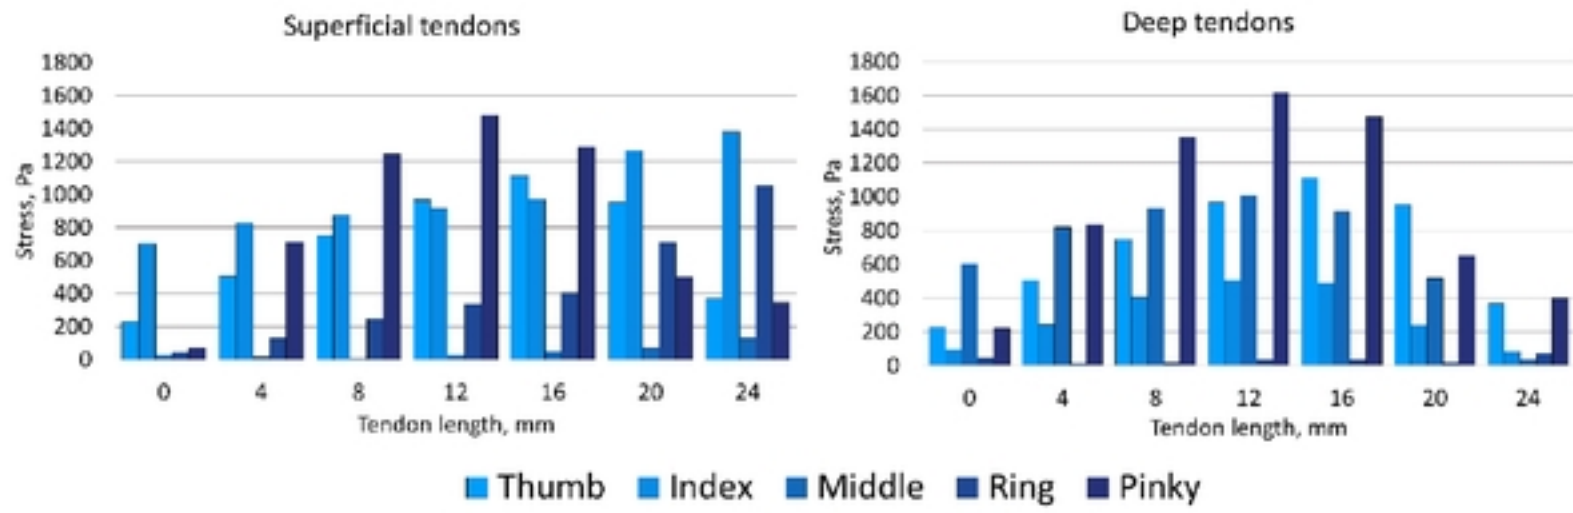

**Fig 6. Tendons stress along tendon length (midline) during finger flexion: (a) superficial tendons, (b) deep tendons**

medRxiv preprint doi: <https://doi.org/10.1101/2023.06.20.23115016>; this version posted June 20, 2023. The copyright holder for this preprint (which was not certified by peer review) is the author/funder, who has granted medRxiv a license to display the preprint in perpetuity. It is made available under a [CC-BY 4.0 International license](https://creativecommons.org/licenses/by/4.0/).

Type: Total Deformation

Unit: mm

Time: 1

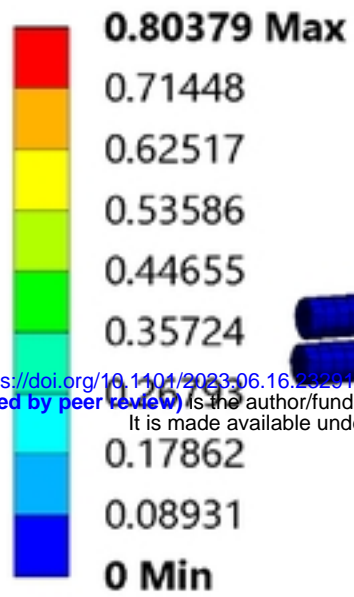

medRxiv preprint doi: <https://doi.org/10.1101/2023.06.16.23281511>; this version posted June 20, 2023. The copyright holder for this preprint (which was not certified by peer review) is the author/funder, who has granted medRxiv a license to display the preprint in perpetuity. It is made available under a [CC-BY 4.0 International license](https://creativecommons.org/licenses/by/4.0/).

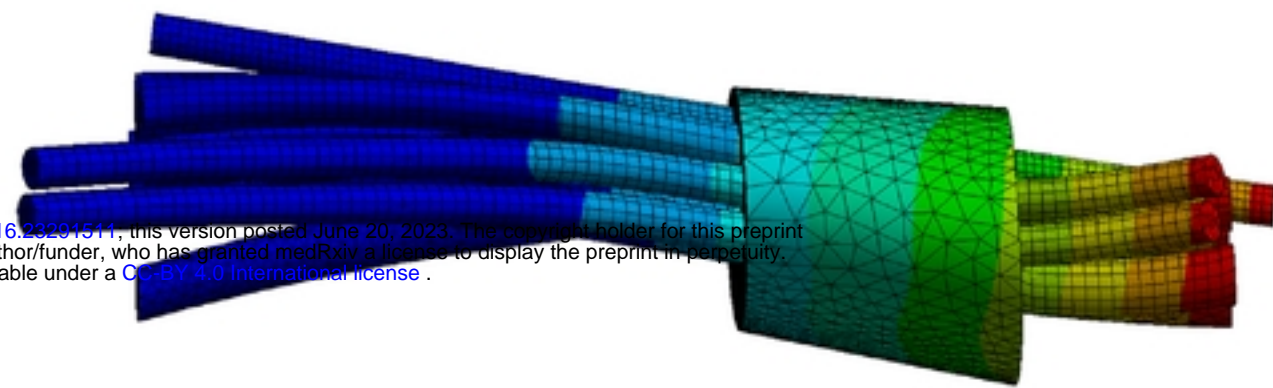

a

Type: Total Deformation

Unit: mm

Time: 15

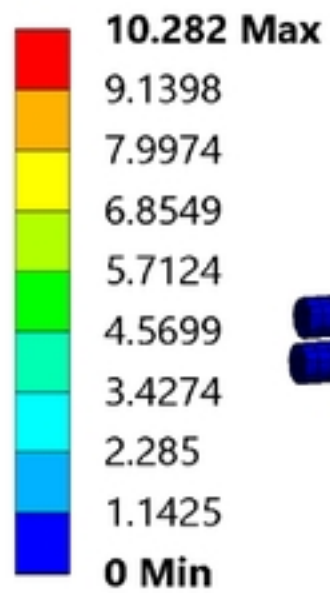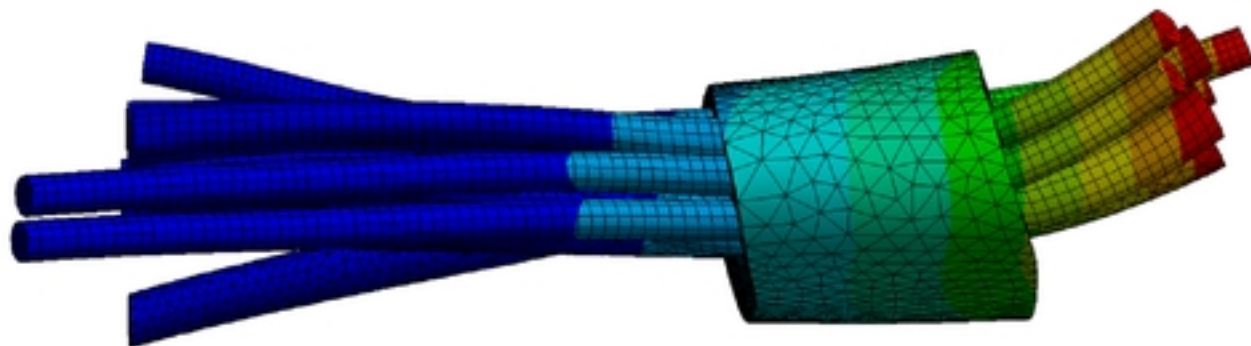

b

Fig 7. Total deformation during wrist flexion: (a)  $t = 1s$ , (b)  $t=15s$ .

Type: Total Deformation  
Unit: mm  
Time: 1

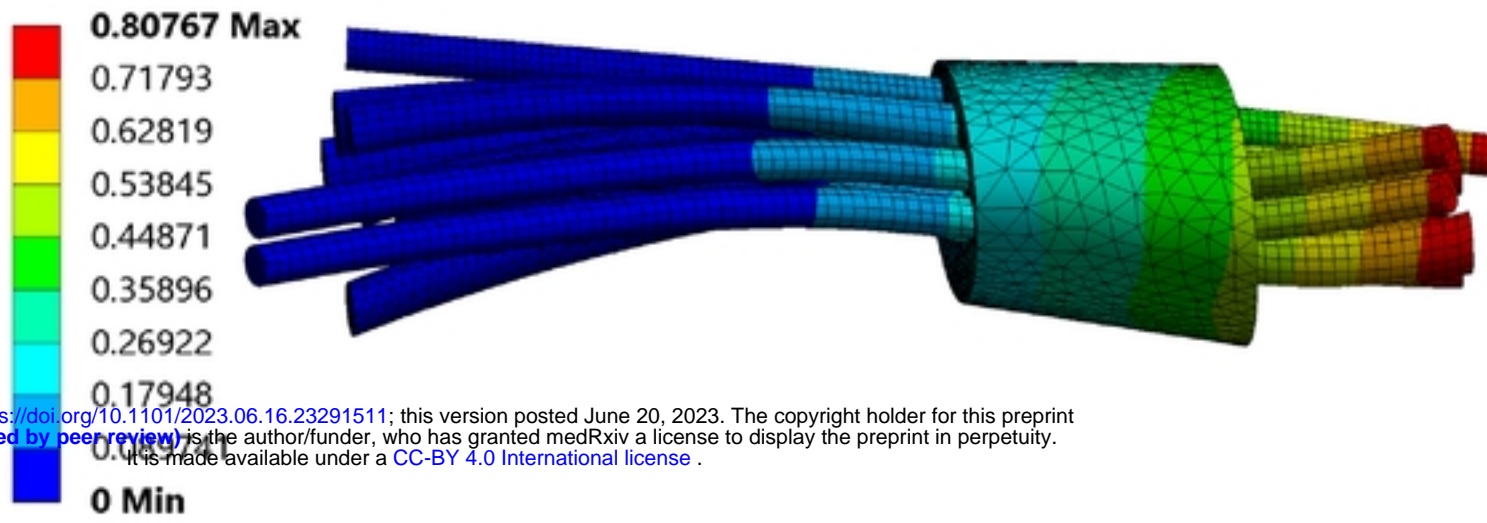

a

Type: Total Deformation  
Unit: mm  
Time: 15

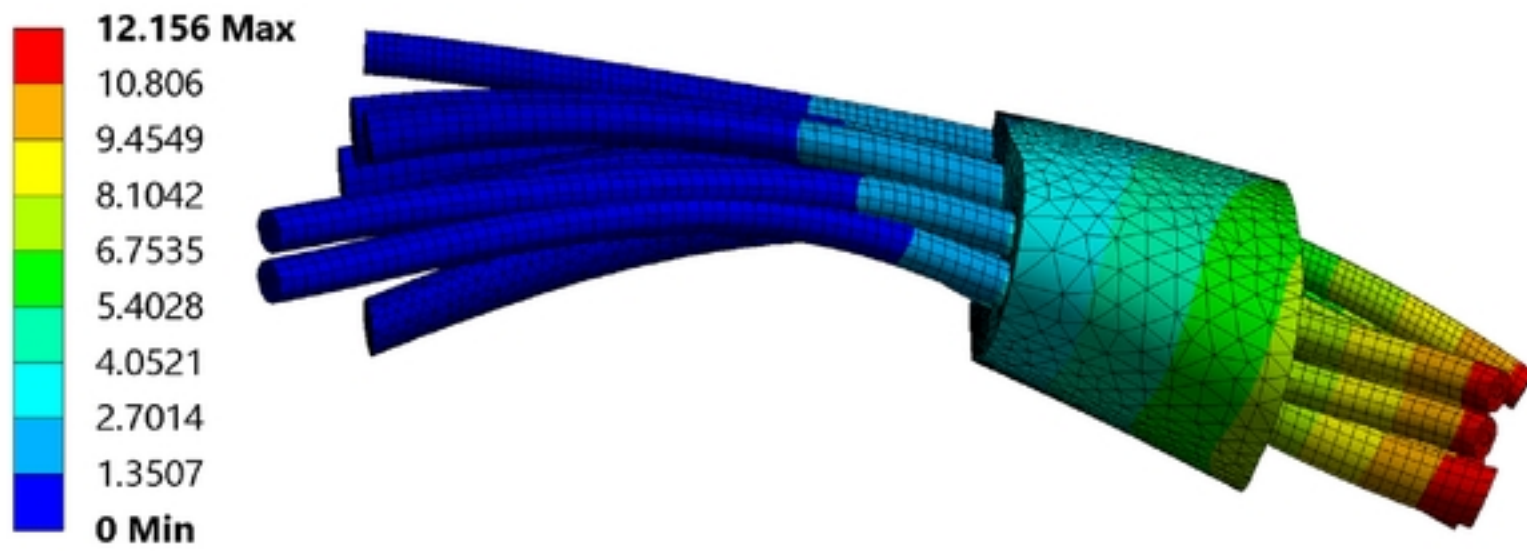

b

**Fig 8.** Total deformation during wrist extension: (a)  $t = 1s$ , (b)  $t=15s$ .

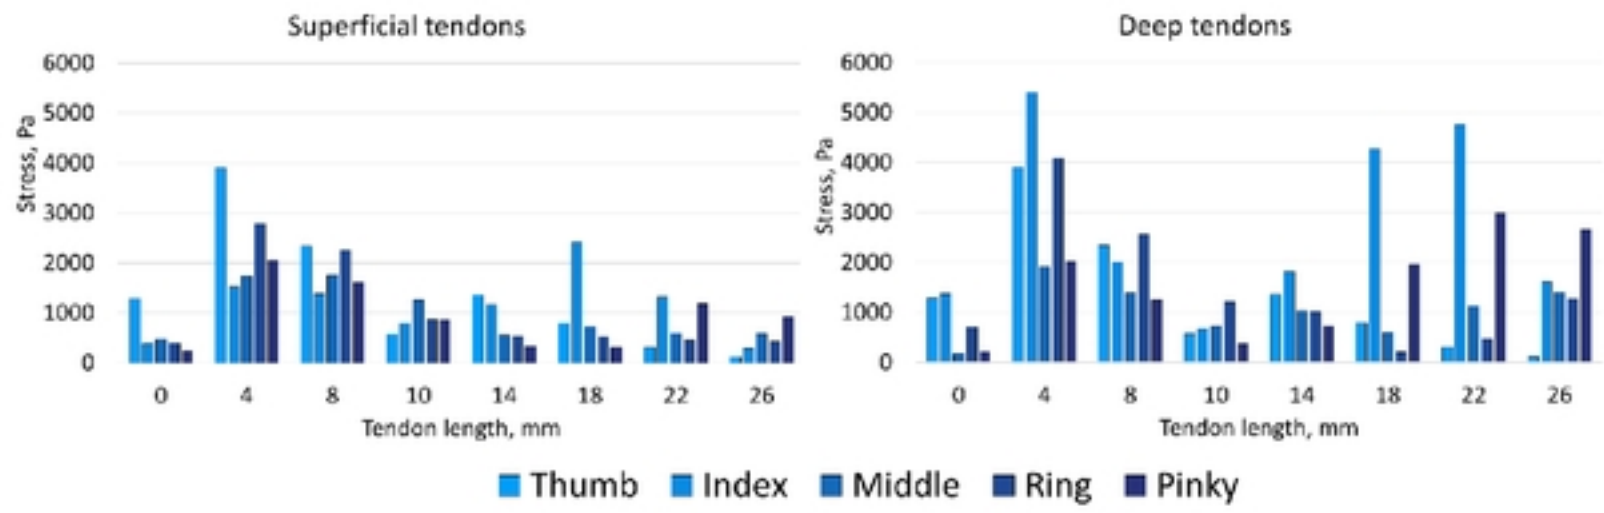

**Fig 9. Stress in the tendons during wrist extension with bonded contact type along midline: (a) superficial tendons, (b) deep tendons.**

medRxiv preprint doi: <https://doi.org/10.1101/2023.06.16.23291511>; this version posted June 20, 2023. The copyright holder for this preprint (which was not certified by peer review) is the author/funder, who has granted medRxiv a license to display the preprint in perpetuity. It is made available under a [CC-BY 4.0 International license](https://creativecommons.org/licenses/by/4.0/).

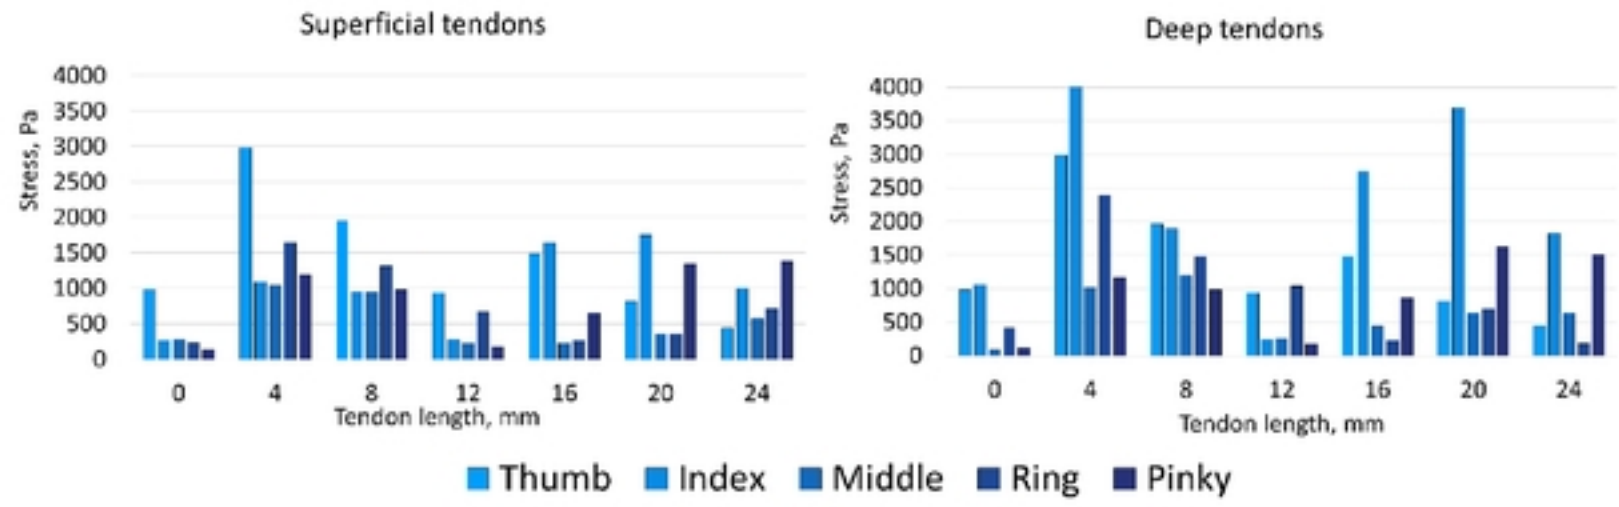

**Fig 10. Stress in the tendons during wrist extension with no separation contact type along**

medRxiv preprint doi: <https://doi.org/10.1101/2023.06.16.23291511>; this version posted June 20, 2023. The copyright holder for this preprint (which was not certified by peer review) is the author/funder, who has granted medRxiv a license to display the preprint in perpetuity. It is made available under a [CC-BY 4.0 International license](https://creativecommons.org/licenses/by/4.0/).

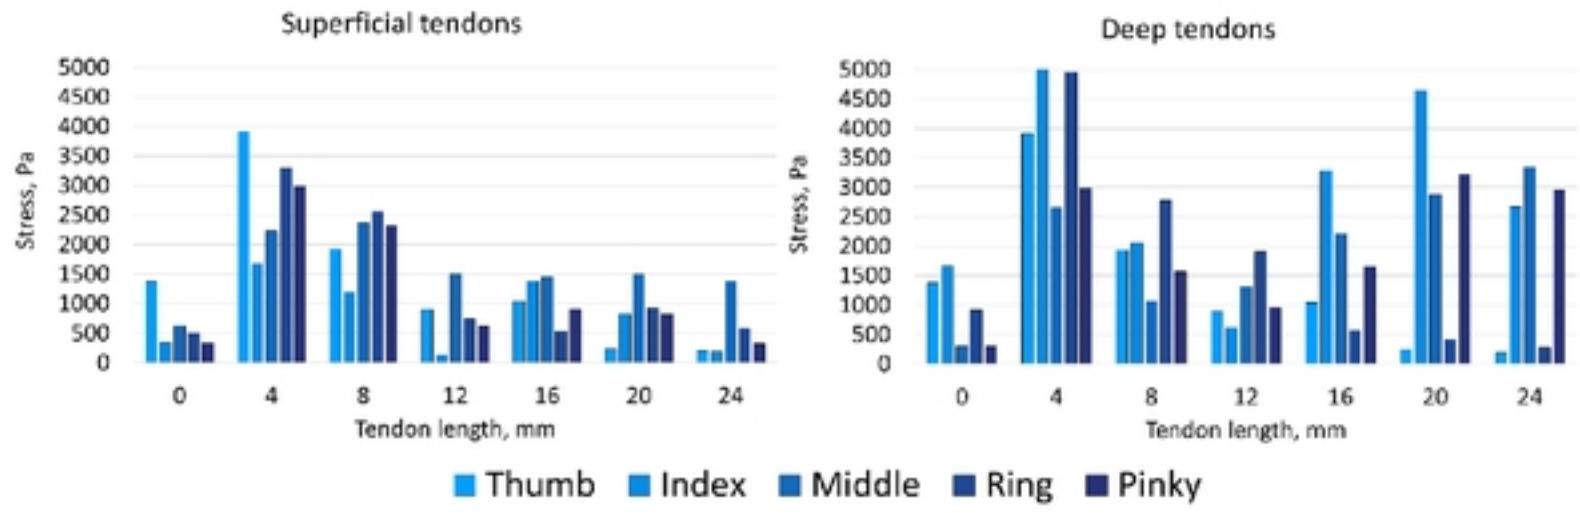

medRxiv preprint doi: <https://doi.org/10.1101/2023.06.16.23291511>; this version posted June 20, 2023. The copyright holder for this preprint (which was not certified by peer review) is the author/funder, who has granted medRxiv a license to display the preprint in perpetuity. It is made available under a [CC-BY 4.0 International license](https://creativecommons.org/licenses/by/4.0/).

**Fig 11. Stress in the tendons during wrist flexion with bonded contact type along midline: (a) superficial tendons, (b) deep tendons**



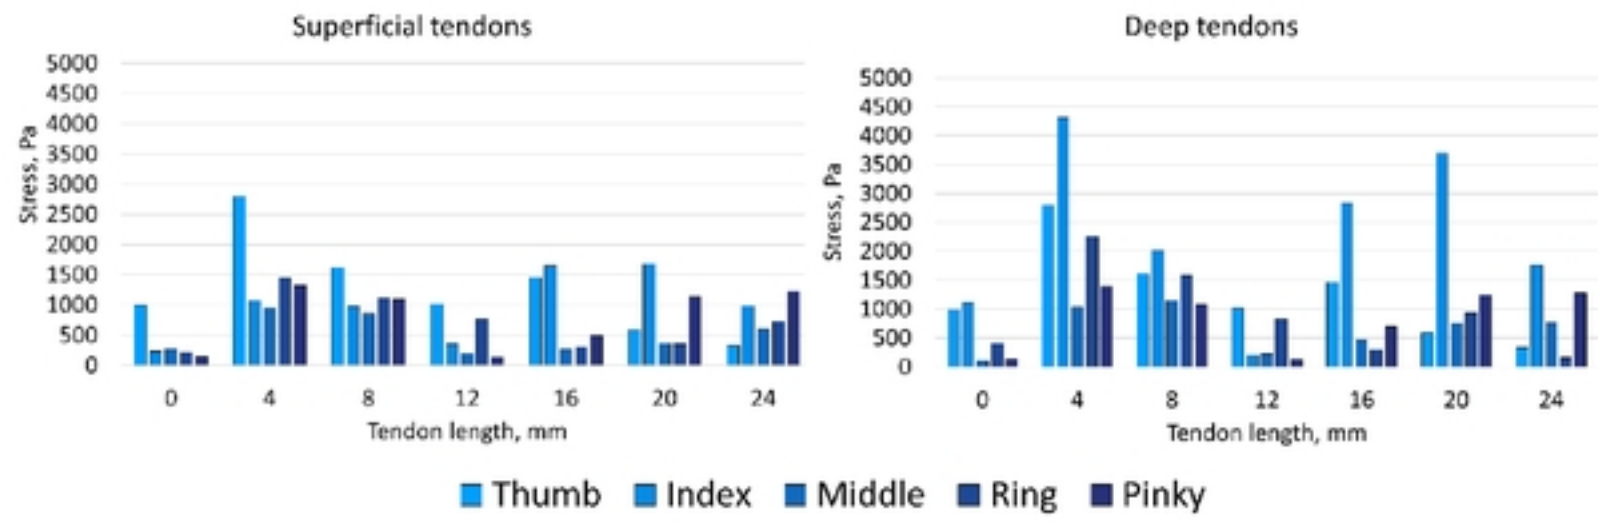

**Fig 12. Stress in the tendons during wrist flexion with no separation contact type along midline (a) superficial tendons, (b) deep tendons.**

medRxiv preprint doi: <https://doi.org/10.1101/2022.06.16.22291771>; this version posted June 20, 2023. The copyright holder for this preprint (which was not certified by peer review) is the author/funder, who has granted medRxiv a license to display the preprint in perpetuity. It is made available under a [CC-BY 4.0 International license](https://creativecommons.org/licenses/by/4.0/).

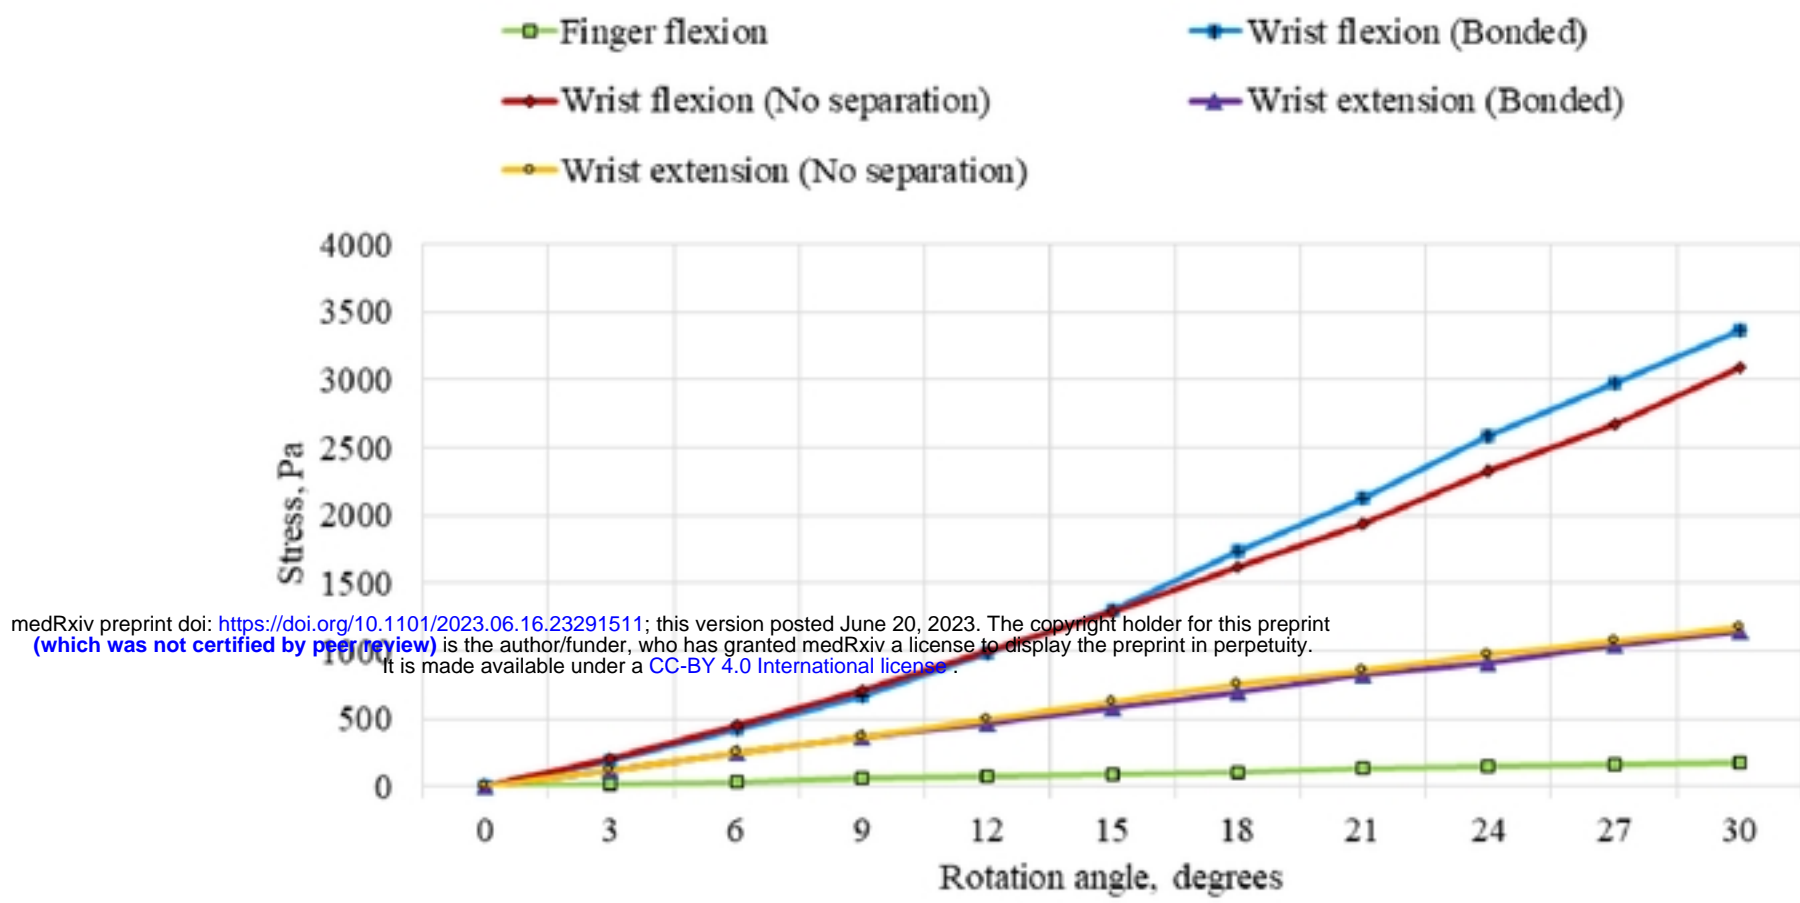

**Fig 13.** Relationship between maximum stresses in the median nerve and angle of rotation during finger flexion and wrist flexion/extension.

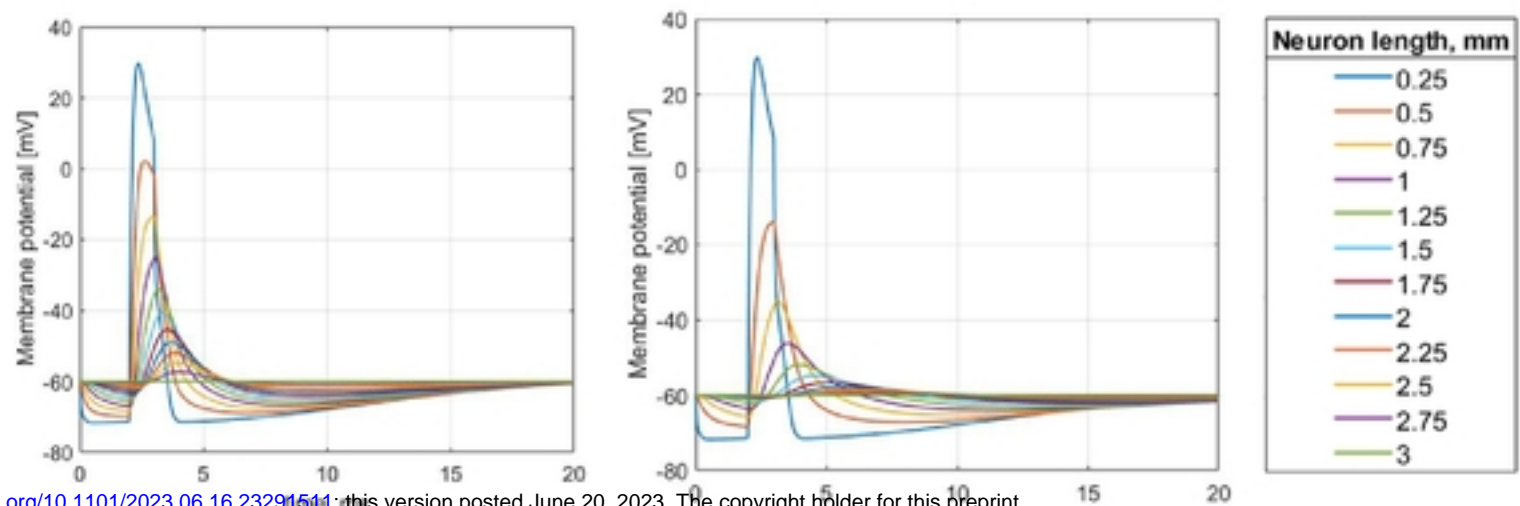

medRxiv preprint doi: <https://doi.org/10.1101/2023.06.16.23291511>; this version posted June 20, 2023. The copyright holder for this preprint (which was not certified by peer review) is the author/funder, who has granted medRxiv a license to display the preprint in perpetuity. It is made available under a [CC-BY 4.0 International license](https://creativecommons.org/licenses/by/4.0/).

**Fig 14.** Dependence of the membrane potential of the deformed median nerve on time at its various areas: (a) – finger flexion (b) – wrist flexion.
